# Supplementary material for: A comparative metabolomics analysis of the components of heartwood and sapwood in Taxus chinensis (Pilger) Rehd
Source: PubMed Central journal article supplement (PMC6881444; doi:10.1038/s41598-019-53839-2), 2019-11-27
Supplement: 41598_2019_53839_MOESM1_ESM.pdf [file 41598_2019_53839_MOESM1_ESM.pdf]

# **A comparative metabolomics analysis of the components of heartwood and sapwood in *Taxus chinensis* (Pilger) Rehd.**

Fenjuan Shao<sup>1</sup>, Lisha Zhang<sup>1</sup>, Juan Guo<sup>2</sup>, Xiaochun Liu<sup>3</sup>, Wenhui Ma<sup>4</sup>, Iain W Wilson<sup>5</sup>,  
Deyou Qiu<sup>1\*</sup>

1 State Key Laboratory of Tree Genetics and Breeding, Key Laboratory of Tree Breeding and Cultivation of National Forestry and Grassland Administration, Research Institute of Forestry, Chinese Academy of Forestry, Beijing, 100091, China

2 Research Institute of Wood Industry, Chinese Academy of Forestry, Beijing 100091, China

3 Gansu Forestry and Grassland Administration, Lanzhou 730030, China

4 Liangdang Forestry Administration, Gansu Province 742400, China

5 CSIRO Agriculture and Food, PO Box 1700, Canberra, ACT 2601, Australia.

**\*Corresponding author:** Deyou Qiu. State Key Laboratory of Tree Genetics and Breeding, Key Laboratory of Tree Breeding and Cultivation of National Forestry and Grassland Administration, Research Institute of Forestry, Chinese Academy of Forestry, Beijing, 100091, China. Tel: +86 10 62889641; Fax: +86 10 62882015;

## Supplementary file 1: Identified metabolites of the heartwood and sapwood.

| Index   | Compounds                                         | Class  | VIP  | Fold_Change | Log2FC |
|---------|---------------------------------------------------|--------|------|-------------|--------|
| pmf0296 | 16-Hydroxy hexadecanoic acid                      | Lipids | 1.23 | 115148.15   | 16.81  |
| pmb0863 | LysoPC 16:2 (2n isomer)                           | Lipids | 1.23 | 68037.04    | 16.05  |
| pmb0890 | MAG (18:2)                                        | Lipids | 1.23 | 40592.59    | 15.31  |
| pmb2467 | $\alpha$ -Linolenic acid                          | Lipids | 1.23 | 25481.48    | 14.64  |
| pmb0149 | MAG (18:4) isomer1                                | Lipids | 1.22 | 14974.07    | 13.87  |
| pmb2325 | MAG (18:3) isomer2                                | Lipids | 1.23 | 14666.67    | 13.84  |
| pma1303 | LysoPC 16:2                                       | Lipids | 1.22 | 14114.81    | 13.78  |
| pmb0864 | LysoPE 14:0                                       | Lipids | 1.22 | 7188.89     | 12.81  |
| pmb2787 | 9-KODE                                            | Lipids | 1.23 | 5255.56     | 12.36  |
| pmb2640 | Lauric acid (C12:0)                               | Lipids | 1.23 | 1766.67     | 10.79  |
| pmf0401 | Docosanoic acid                                   | Lipids | 0.87 | 811.44      | 9.66   |
| pmb2221 | 4-Hydroxysphinganine                              | Lipids | 0.99 | 18.04       | 4.17   |
| pmb1605 | MAG (18:3) isomer3                                | Lipids | 0.97 | 17.58       | 4.14   |
| pmb0165 | LysoPC 16:1                                       | Lipids | 0.95 | 14.09       | 3.82   |
| pmf0396 | Linoleic acid                                     | Lipids | 1.18 | 5.50        | 2.46   |
| pmb0159 | DGMG (18:2) isomer2                               | Lipids | 0.71 | 4.99        | 2.32   |
| pmb1562 | MAG (18:4) isomer3                                | Lipids | 0.62 | 2.76        | 1.46   |
| pmb0889 | Punicic acid                                      | Lipids | 1.15 | 2.64        | 1.40   |
| pmb2786 | 9-HOTrE                                           | Lipids | 1.09 | 2.29        | 1.19   |
| pma3606 | 9-Hydroxy-(10E,12Z,15Z)-<br>octadecatrienoic acid | Lipids | 0.68 | 1.67        | 0.74   |
| pma0461 | 14,15-Dehydrocrepenynic acid                      | Lipids | 1.02 | 1.63        | 0.71   |
| pmf0402 | Lignoceric acid                                   | Lipids | 0.77 | 1.48        | 0.56   |
| pmb2792 | 13-HOTrE(r)                                       | Lipids | 0.60 | 1.31        | 0.39   |
| pmb1574 | Octadecadien-6-ynoic acid                         | Lipids | 0.63 | 1.28        | 0.36   |
| pmb2791 | 9-HpOTrE                                          | Lipids | 0.66 | 1.22        | 0.29   |
| pmf0293 | 1-Octadecanol                                     | Lipids | 1.07 | 1.12        | 0.17   |
| pmb0865 | LysoPC 18:3 (2n isomer)                           | Lipids | 0.24 | 1.09        | 0.12   |
| pmb2643 | Myristoleic acid (C14:1)                          | Lipids | 0.01 | 0.99        | -0.01  |
| pmf0399 | cis-Gondoic acid                                  | Lipids | 0.17 | 0.98        | -0.03  |
| pmb2804 | 13-HPODE                                          | Lipids | 0.19 | 0.96        | -0.06  |
| pmb3121 | LysoPE 18:1                                       | Lipids | 0.49 | 0.82        | -0.29  |
| pmb0292 | Cholesterol                                       | Lipids | 0.81 | 0.82        | -0.29  |
| pmb3132 | LysoPE 18:1 (2n isomer)                           | Lipids | 0.73 | 0.72        | -0.47  |
| pme2827 | Palmitaldehyde                                    | Lipids | 0.78 | 0.68        | -0.56  |
| pmb0873 | LysoPC 18:2 (2n isomer)                           | Lipids | 0.94 | 0.61        | -0.72  |
| pmf0398 | Arachidic acid                                    | Lipids | 1.19 | 0.45        | -1.14  |
| pmb0882 | LysoPC 18:1                                       | Lipids | 1.11 | 0.37        | -1.43  |
| pmb1650 | Octadeca-11E,13E,15Z-trienoic acid                | Lipids | 1.21 | 0.36        | -1.48  |
| pmd0160 | LysoPE 16:0 (2n isomer)                           | Lipids | 1.16 | 0.31        | -1.67  |
| pmb3117 | LysoPE 16:0                                       | Lipids | 1.15 | 0.31        | -1.70  |
| pmb0160 | MAG (18:3) isomer5                                | Lipids | 0.76 | 0.13        | -2.94  |
| pmc0960 | LysoPC 20:4                                       | Lipids | 1.21 | 0.12        | -3.01  |
| pmb0859 | LysoPC 18:1 (2n isomer)                           | Lipids | 1.23 | 0.12        | -3.08  |
| pmb2388 | LysoPC 18:0 (2n isomer)                           | Lipids | 1.00 | 0.06        | -3.99  |

|         |                                                        |                               |      |           |        |
|---------|--------------------------------------------------------|-------------------------------|------|-----------|--------|
| pmd0136 | LysoPC 18:0                                            | Lipids                        | 1.22 | 0.06      | -4.14  |
| pmb2319 | LysoPC 15:0                                            | Lipids                        | 0.92 | 0.04      | -4.52  |
| pmb0854 | LysoPC 18:3                                            | Lipids                        | 1.22 | 0.01      | -6.50  |
| pmb0855 | LysoPC 16:0                                            | Lipids                        | 1.22 | 0.01      | -6.59  |
| pmd0132 | LysoPC 16:0 (2n isomer)                                | Lipids                        | 1.22 | 0.01      | -6.68  |
| pmb2228 | LysoPC 19:0                                            | Lipids                        | 1.23 | 0.00      | -13.73 |
| pmf0395 | Oleic acid                                             | Lipids                        | 0.86 | 0.00      | -17.63 |
| pmb2406 | LysoPC 17:0                                            | Lipids                        | 1.23 | 0.00      | -17.82 |
| pmf0159 | Azadiradione                                           | Sterides                      | 1.23 | 18333.33  | 14.16  |
| pmf0564 | Ecdysterone                                            | Sterides                      | 1.20 | 7.98      | 3.00   |
| pmf0073 | Campesterol                                            | Sterides                      | 1.18 | 1.12      | 0.16   |
| pmf0079 | Soyasapogenol B                                        | Sterides                      | 1.06 | 1.05      | 0.07   |
| pmf0070 | $\beta$ -Sitosterol                                    | Sterides                      | 0.51 | 0.90      | -0.15  |
| pmf0091 | 2,3-Oxidosqualene                                      | Sterides                      | 0.91 | 0.87      | -0.20  |
| pmf0085 | Cycloartenol                                           | Sterides                      | 0.60 | 0.86      | -0.21  |
| pmf0513 | Ruscogenin                                             | Sterides                      | 1.23 | 0.00      | -13.35 |
| pme0237 | Ethyl 3,4-Dihydroxybenzoate<br>(Ethyl protocatechuate) | Organic acids and derivatives | 1.23 | 266296.30 | 18.02  |
| pmb1587 | 4-Hydroxy-3,5-<br>diisopropylbenzaldehyde              | Organic acids and derivatives | 1.23 | 100814.81 | 16.62  |
| pmb0751 | 5-O-p-Coumaroyl shikimic acid                          | Organic acids and derivatives | 1.22 | 29518.52  | 14.85  |
| pme1724 | Methyl benzoate                                        | Organic acids and derivatives | 1.22 | 19970.37  | 14.29  |
| pmf0419 | Salicin                                                | Organic acids and derivatives | 1.23 | 18555.56  | 14.18  |
| pma0149 | Sinapoyl malate                                        | Organic acids and derivatives | 0.91 | 56.00     | 5.81   |
| pme2362 | Mandelic acid                                          | Organic acids and derivatives | 1.15 | 34.29     | 5.10   |
| pmb0404 | Arabidopyl shikimic acid                               | Organic acids and derivatives | 0.98 | 17.85     | 4.16   |
| pme0310 | Ethyl gallate                                          | Organic acids and derivatives | 0.92 | 9.68      | 3.27   |
| pme0401 | Chlorogenic acid methyl ester                          | Organic acids and derivatives | 0.79 | 8.72      | 3.12   |
| pma3724 | 1-O-Feruloyl quinic acid                               | Organic acids and derivatives | 0.71 | 5.43      | 2.44   |
| pmb3074 | 3-O-p-Coumaroyl quinic acid                            | Organic acids and derivatives | 1.08 | 5.42      | 2.44   |
| pme0293 | (3,4-Dimethoxyphenyl) acetic acid                      | Organic acids and derivatives | 0.70 | 5.05      | 2.34   |
| pme2670 | 4-Hydroxybenzaldehyde                                  | Organic acids and derivatives | 0.68 | 3.78      | 1.92   |
| pme1814 | 2,5-dihydroxybenzoic acid<br>(Gentisic acid)           | Organic acids and derivatives | 1.18 | 3.36      | 1.75   |
| pme3198 | 2,4-Dihydroxybenzoic acid                              | Organic acids and derivatives | 1.17 | 3.32      | 1.73   |
| pme2706 | 2,3-Dihydroxybenzoic acid                              | Organic acids and derivatives | 1.17 | 3.31      | 1.73   |
| pmf0066 | 2'-Acetylacteoside                                     | Organic acids and derivatives | 0.42 | 3.07      | 1.62   |
| pme2761 | 4-Hydroxy-2-oxoglutaric acid                           | Organic acids and derivatives | 1.19 | 2.87      | 1.52   |
| pmf0280 | D-Galacturonic acid                                    | Organic acids and derivatives | 1.20 | 2.50      | 1.32   |
| pmb0758 | Anisic acid O-feruloyl hexoside                        | Organic acids and derivatives | 1.02 | 2.44      | 1.29   |
| pme3085 | 2-(Formylamino)benzoic acid                            | Organic acids and derivatives | 0.89 | 2.18      | 1.12   |
| pme2603 | 3-Hydroxyanthranilic acid                              | Organic acids and derivatives | 0.48 | 1.97      | 0.98   |
| pmf0096 | Oxalic acid                                            | Organic acids and derivatives | 0.40 | 1.44      | 0.53   |
| pme0240 | Benzoic acid                                           | Organic acids and derivatives | 0.96 | 1.44      | 0.53   |
| pme3207 | trans,trans-Muconic acid                               | Organic acids and derivatives | 0.80 | 1.33      | 0.41   |
| pme0397 | Shikimic acid                                          | Organic acids and derivatives | 0.18 | 1.29      | 0.36   |
| pme3069 | Taurocholic acid                                       | Organic acids and derivatives | 0.78 | 1.27      | 0.34   |
| pmf0408 | Plantamajoside                                         | Organic acids and derivatives | 0.38 | 1.26      | 0.34   |

|         |                                                  |                               |      |      |       |
|---------|--------------------------------------------------|-------------------------------|------|------|-------|
| pme2131 | 3-(3-hydroxyphenyl)propionate acid               | Organic acids and derivatives | 0.37 | 1.15 | 0.20  |
| pmb3075 | 3-O-p-Coumaroyl shikimic acid                    | Organic acids and derivatives | 0.54 | 1.13 | 0.18  |
| pme0024 | 2-Aminoethanesulfonic acid                       | Organic acids and derivatives | 0.12 | 1.10 | 0.13  |
| pmb0247 | p-Aminobenzoate                                  | Organic acids and derivatives | 0.12 | 1.01 | 0.01  |
| pmb3099 | Diethyl phosphate                                | Organic acids and derivatives | 0.55 | 0.92 | -0.12 |
| pme2598 | 3,4-Dihydroxybenzeneacetic acid                  | Organic acids and derivatives | 0.28 | 0.91 | -0.14 |
| pme0049 | 2-Aminoethanesulfinic acid                       | Organic acids and derivatives | 0.60 | 0.89 | -0.16 |
| pme0281 | Terephthalic acid                                | Organic acids and derivatives | 0.85 | 0.89 | -0.17 |
| pmb0766 | Azoxystrobin acid                                | Organic acids and derivatives | 0.41 | 0.86 | -0.22 |
| pme1292 | Homogentisic acid                                | Organic acids and derivatives | 0.65 | 0.83 | -0.27 |
| pme2550 | Cis-Aconitic acid                                | Organic acids and derivatives | 0.47 | 0.82 | -0.28 |
| pme1852 | Creatine                                         | Organic acids and derivatives | 0.49 | 0.81 | -0.30 |
| pme0474 | 4-Hydroxybenzoic acid                            | Organic acids and derivatives | 1.07 | 0.67 | -0.59 |
| pme0398 | Chlorogenic acid<br>(3-O-Caffeoylquinic acid)    | Organic acids and derivatives | 0.56 | 0.57 | -0.81 |
| pme3009 | trans-Citric acid                                | Organic acids and derivatives | 1.20 | 0.53 | -0.92 |
| pme0269 | Dodecanedioic acid                               | Organic acids and derivatives | 1.13 | 0.52 | -0.93 |
| pme1816 | Neochlorogenic acid<br>(5-O-Caffeoylquinic acid) | Organic acids and derivatives | 0.57 | 0.48 | -1.04 |
| pme0309 | Methyl gallate                                   | Organic acids and derivatives | 1.07 | 0.47 | -1.07 |
| pme1162 | Gallic acid                                      | Organic acids and derivatives | 0.67 | 0.44 | -1.20 |
| pme0239 | 2-furanoic acid                                  | Organic acids and derivatives | 1.09 | 0.42 | -1.24 |
| pme2901 | 1-O-Caffeoyl quinic acid                         | Organic acids and derivatives | 0.42 | 0.41 | -1.29 |
| pme1730 | D-Erythronolactone                               | Organic acids and derivatives | 1.20 | 0.41 | -1.29 |
| pme1820 | p-Hydroxyphenyl acetic acid                      | Organic acids and derivatives | 1.10 | 0.35 | -1.50 |
| pme2380 | A-Ketoglutaric acid                              | Organic acids and derivatives | 1.21 | 0.32 | -1.62 |
| pme2923 | Acetoxyacetic acid                               | Organic acids and derivatives | 1.05 | 0.32 | -1.65 |
| pmf0420 | Benzyl acetate                                   | Organic acids and derivatives | 0.88 | 0.29 | -1.79 |
| pme2601 | 3-Hydroxypropanoic acid                          | Organic acids and derivatives | 1.01 | 0.28 | -1.83 |
| pmb2654 | Anthranilate O-hexosyl-O-hexoside                | Organic acids and derivatives | 1.05 | 0.27 | -1.91 |
| pme0486 | Methylmalonic acid                               | Organic acids and derivatives | 1.18 | 0.25 | -2.00 |
| pme3096 | Aminomalonic acid                                | Organic acids and derivatives | 1.18 | 0.25 | -2.01 |
| pme1830 | Succinic acid                                    | Organic acids and derivatives | 1.18 | 0.25 | -2.01 |
| pme0291 | DI-2-Amino-octanoic acid                         | Organic acids and derivatives | 1.21 | 0.24 | -2.05 |
| pmb2826 | Citramalate                                      | Organic acids and derivatives | 1.03 | 0.21 | -2.22 |
| pmf0578 | Citric acid monohydrate                          | Organic acids and derivatives | 1.01 | 0.21 | -2.24 |
| pme0413 | Vanillin                                         | Organic acids and derivatives | 1.21 | 0.20 | -2.33 |
| pme2009 | L-(+)-Tartaric acid                              | Organic acids and derivatives | 1.18 | 0.20 | -2.34 |
| pme2241 | Citraconic acid                                  | Organic acids and derivatives | 1.14 | 0.17 | -2.57 |
| pme2036 | Quinic acid                                      | Organic acids and derivatives | 1.14 | 0.14 | -2.80 |
| pme0207 | 3-Hydroxybutyrate                                | Organic acids and derivatives | 1.19 | 0.14 | -2.81 |
| pmf0425 | D-tartaric acid                                  | Organic acids and derivatives | 1.21 | 0.13 | -2.90 |
| pme3719 | D-Xyloic acid                                    | Organic acids and derivatives | 1.21 | 0.13 | -2.98 |
| pme2050 | Citric acid                                      | Organic acids and derivatives | 1.10 | 0.11 | -3.25 |
| pmb1912 | 10-Formyl-THF                                    | Organic acids and derivatives | 1.20 | 0.10 | -3.37 |
| pme2169 | Fumaric acid                                     | Organic acids and derivatives | 1.20 | 0.09 | -3.48 |
| pme0275 | 4-Oxopentanoate                                  | Organic acids and derivatives | 1.19 | 0.07 | -3.82 |
| pme3346 | 5-hydroxyhexanoic acid                           | Organic acids and derivatives | 0.85 | 0.05 | -4.21 |

|         |                                      |                               |      |           |        |
|---------|--------------------------------------|-------------------------------|------|-----------|--------|
| pme1218 | 2-Picolinic acid                     | Organic acids and derivatives | 0.89 | 0.03      | -5.03  |
| pme0271 | Maleic acid                          | Organic acids and derivatives | 1.05 | 0.03      | -5.20  |
| pme2049 | 2-Hydroxybutanoic acid               | Organic acids and derivatives | 1.22 | 0.02      | -5.49  |
| pmb2657 | Argininosuccinate                    | Organic acids and derivatives | 1.14 | 0.02      | -5.52  |
| pme2033 | L(-)-Malic acid                      | Organic acids and derivatives | 1.22 | 0.01      | -6.24  |
| pme3309 | 2-Methylglutaric acid                | Organic acids and derivatives | 1.23 | 0.01      | -6.27  |
| pme3098 | 4-Methylvaleric acid                 | Organic acids and derivatives | 1.09 | 0.01      | -6.67  |
| pme2541 | $\alpha$ -Hydroxyisobutyric acid     | Organic acids and derivatives | 1.07 | 0.01      | -6.83  |
| pme0243 | Glutaric acid                        | Organic acids and derivatives | 1.22 | 0.01      | -7.00  |
| pme2129 | (S)-(-)-2-Hydroxyisocaproic acid     | Organic acids and derivatives | 1.20 | 0.01      | -7.01  |
| pme0286 | 2-Hydroxyisocaproic acid             | Organic acids and derivatives | 0.99 | 0.01      | -7.06  |
| pme0267 | 2-Methylsuccinic acid                | Organic acids and derivatives | 1.22 | 0.01      | -7.20  |
| pme0250 | Azelaic acid                         | Organic acids and derivatives | 1.21 | 0.01      | -7.62  |
| pme1977 | Suberic acid                         | Organic acids and derivatives | 1.22 | 0.00      | -8.43  |
| pme2935 | 2-Oxovaleric acid                    | Organic acids and derivatives | 1.23 | 0.00      | -11.62 |
| pmb2928 | Gallic acid O-Hexoside               | Organic acids and derivatives | 1.23 | 0.00      | -12.04 |
| pme2284 | Pentadecafluorooctanoic acid         | Organic acids and derivatives | 1.23 | 0.00      | -12.78 |
| pme1299 | DI-3,4-Dihydroxymandelic acid        | Organic acids and derivatives | 1.23 | 0.00      | -13.85 |
| pme1711 | 3-Hydroxy-3-methyl butyric acid      | Organic acids and derivatives | 1.23 | 0.00      | -13.87 |
| pme0266 | Sebacate                             | Organic acids and derivatives | 1.23 | 0.00      | -14.15 |
| pme3154 | (Rs)-Mevalonic acid                  | Organic acids and derivatives | 1.23 | 0.00      | -14.58 |
| pme3034 | ethylmalonate                        | Organic acids and derivatives | 1.23 | 0.00      | -16.32 |
| pmb2871 | ,5-dihydroxy benzoic acid O-hexsid   | Organic acids and derivatives | 1.23 | 0.00      | -17.28 |
| pme0542 | Indole-2-carboxylic acid             | Indole derivatives            | 0.87 | 4118.85   | 12.01  |
| pmb0312 | 5-methoxyindole-3-carbaldehyde       | Indole derivatives            | 0.94 | 11.11     | 3.47   |
| pmb0813 | 1-Methoxyindole-3-carbaldehyde       | Indole derivatives            | 1.15 | 6.92      | 2.79   |
| pme2720 | Indole-3-carboxaldehyde              | Indole derivatives            | 0.97 | 0.08      | -3.56  |
| pme0543 | Indole-5-carboxylic acid             | Indole derivatives            | 0.99 | 0.04      | -4.68  |
| pme3279 | 2'-Hydroxygenistein                  | Isoflavone                    | 1.23 | 45962.96  | 15.49  |
| pme1578 | enistein (4',5,7-Trihydroxyisoflavon | Isoflavone                    | 0.87 | 43111.44  | 15.40  |
| pme3451 | Rotenone                             | Isoflavone                    | 1.23 | 35777.78  | 15.13  |
| pme3233 | Calycosin                            | Isoflavone                    | 0.95 | 15.93     | 3.99   |
| pme3210 | Genistein 7-O-Glucoside (Genistin)   | Isoflavone                    | 1.21 | 1.77      | 0.83   |
| pme1496 | Formononetin (4'-O-methylaidzein)    | Isoflavone                    | 0.60 | 0.56      | -0.85  |
| pme3292 | Prunetin                             | Isoflavone                    | 1.04 | 0.32      | -1.66  |
| pme3250 | Biochanin A                          | Isoflavone                    | 1.06 | 0.26      | -1.92  |
| pme3263 | 2'-Hydroxydaidzein                   | Isoflavone                    | 1.23 | 0.00      | -15.93 |
| pme2289 | Vitamin A                            | Vitamins and derivatives      | 1.23 | 314444.44 | 18.26  |
| pme2266 | Biotin                               | Vitamins and derivatives      | 1.21 | 28.20     | 4.82   |
| pme1952 | Riboflavin                           | Vitamins and derivatives      | 1.16 | 8.94      | 3.16   |
| pme2819 | All-trans-13,14-dihydroretinol       | Vitamins and derivatives      | 0.72 | 7.64      | 2.93   |
| pma3101 | Nicotinate ribonucleoside            | Vitamins and derivatives      | 0.97 | 1.69      | 0.75   |
| pme2111 | L-ascorbate                          | Vitamins and derivatives      | 1.02 | 1.22      | 0.29   |
| pme1383 | Pyridoxine                           | Vitamins and derivatives      | 1.02 | 0.39      | -1.35  |
| pme0491 | 6-hydroxynicotinic acid              | Vitamins and derivatives      | 0.98 | 0.37      | -1.45  |
| pme0496 | Nicotinic acid                       | Vitamins and derivatives      | 1.14 | 0.29      | -1.80  |
| pme2167 | Orotic acid                          | Vitamins and derivatives      | 1.13 | 0.23      | -2.12  |
| pmb0802 | D-Pantothenic acid                   | Vitamins and derivatives      | 1.00 | 0.03      | -4.91  |

|         |                                    |                          |      |            |        |
|---------|------------------------------------|--------------------------|------|------------|--------|
| pme1014 | Menaquinone (K2)                   | Vitamins and derivatives | 0.54 | 0.00       | -13.39 |
| pmf0604 | $\beta$ -Caryophyllene             | Terpene                  | 1.23 | 1548148.15 | 20.56  |
| pmf0476 | Crocetin                           | Terpene                  | 1.23 | 119666.67  | 16.87  |
| pmb2222 | Phytocassane C                     | Terpene                  | 1.23 | 46925.93   | 15.52  |
| pme0080 | Cucurbitacin B                     | Terpene                  | 1.22 | 22837.04   | 14.48  |
| pmb1530 | Phytocassane D                     | Terpene                  | 1.23 | 21407.41   | 14.39  |
| pmf0592 | Artemisinin                        | Terpene                  | 1.23 | 17925.93   | 14.13  |
| pme2184 | Nomilin                            | Terpene                  | 1.22 | 14600.00   | 13.83  |
| pme0064 | Cucurbitacin I                     | Terpene                  | 1.22 | 4162.96    | 12.02  |
| pmf0286 | Phytol                             | Terpene                  | 1.20 | 4.64       | 2.21   |
| pmf0477 | Pachymic acid                      | Terpene                  | 0.13 | 1.13       | 0.17   |
| pmf0509 | (-)-Camphor                        | Terpene                  | 0.63 | 1.03       | 0.05   |
| pmf0613 | $\alpha$ -Terpineol                | Terpene                  | 0.08 | 1.00       | 0.00   |
| pme1643 | (+)-piperitol                      | Terpene                  | 0.11 | 0.96       | -0.05  |
| pme0062 | Cucurbitacin D                     | Terpene                  | 0.71 | 0.73       | -0.46  |
| pmf0465 | Geniposide                         | Terpene                  | 0.95 | 0.57       | -0.81  |
| pmf0497 | Albiflorin                         | Terpene                  | 0.61 | 0.44       | -1.18  |
| pmf0325 | Glucocheirolin                     | Terpene                  | 0.90 | 0.15       | -2.69  |
| pmf0272 | Galactinol Dihydrate               | Carbohydrates            | 1.23 | 9485.19    | 13.21  |
| pmf0574 | Sucralose                          | Carbohydrates            | 1.06 | 107.05     | 6.74   |
| pme1846 | D(+)-Glucose                       | Carbohydrates            | 1.07 | 1.50       | 0.58   |
| pmb2858 | Maltotetraose                      | Carbohydrates            | 0.63 | 1.34       | 0.43   |
| pmf0139 | D-(+)-Galactose                    | Carbohydrates            | 0.33 | 0.96       | -0.06  |
| pme2435 | L-Fucose                           | Carbohydrates            | 1.10 | 0.65       | -0.63  |
| pmf0138 | D-(+)-Mannose                      | Carbohydrates            | 1.18 | 0.55       | -0.86  |
| pme1021 | D-(+)-Glucono-1,5-lactone          | Carbohydrates            | 1.18 | 0.27       | -1.87  |
| pme2019 | DL-Arabinose                       | Carbohydrates            | 1.14 | 0.21       | -2.22  |
| pma6455 | Ribulose-5-phosphate               | Carbohydrates            | 0.75 | 0.16       | -2.65  |
| pmf0282 | Melibiose                          | Carbohydrates            | 1.15 | 0.13       | -2.97  |
| pme0519 | D-(+)-Sucrose                      | Carbohydrates            | 1.15 | 0.12       | -3.05  |
| pmf0032 | Galactinol                         | Carbohydrates            | 1.16 | 0.12       | -3.11  |
| pme3313 | D-Fructose 6-phosphate             | Carbohydrates            | 1.14 | 0.07       | -3.93  |
| pmb2653 | D(+)-Melezitose O-rhamnoside       | Carbohydrates            | 0.92 | 0.04       | -4.61  |
| pme3160 | D-Glucose 6-phosphate              | Carbohydrates            | 1.20 | 0.03       | -4.97  |
| pmf0035 | Glucose-1-phosphate                | Carbohydrates            | 1.18 | 0.03       | -5.01  |
| pmf0220 | D-Fructose 6-phosphate-disodium sa | Carbohydrates            | 1.19 | 0.02       | -5.36  |
| pmb3088 | Trehalose 6-phosphate              | Carbohydrates            | 1.20 | 0.01       | -6.41  |
| pme0500 | D(+)-Melezitose                    | Carbohydrates            | 0.99 | 0.01       | -6.71  |
| pmf0485 | Panose                             | Carbohydrates            | 1.21 | 0.01       | -6.95  |
| pmf0481 | Dehydrocorydaline                  | Alkaloids                | 1.22 | 786666.67  | 19.59  |
| pme2658 | N-Methyltryptamine                 | Alkaloids                | 1.23 | 165925.93  | 17.34  |
| pmb2849 | Camptothecin                       | Alkaloids                | 1.23 | 47222.22   | 15.53  |
| pmf0500 | Capsaicin                          | Alkaloids                | 1.22 | 43666.67   | 15.41  |
| pmf0311 | Coronatine                         | Alkaloids                | 1.22 | 33703.70   | 15.04  |
| pmf0328 | lumichrome                         | Alkaloids                | 1.23 | 31370.37   | 14.94  |
| pmf0612 | Piperine                           | Alkaloids                | 1.23 | 16222.22   | 13.99  |
| pmf0307 | Solasodine                         | Alkaloids                | 1.22 | 11851.85   | 13.53  |
| pmf0329 | Protopine                          | Alkaloids                | 1.22 | 10151.85   | 13.31  |

|         |                                   |           |      |           |        |
|---------|-----------------------------------|-----------|------|-----------|--------|
| pmb0426 | 5-Methoxy-N,N-dimethyltryptamine  | Alkaloids | 1.13 | 988.93    | 9.95   |
| pmf0473 | Baccatin III                      | Alkaloids | 1.01 | 512.73    | 9.00   |
| pmf0102 | Ajmaline                          | Alkaloids | 1.02 | 434.11    | 8.76   |
| pme2786 | N-Acetyl-5-hydroxytryptamine      | Alkaloids | 1.05 | 104.35    | 6.71   |
| pmf0557 | Acid orange 20                    | Alkaloids | 0.83 | 19.10     | 4.26   |
| pmb0770 | N-Feruloyl serotonin              | Alkaloids | 0.96 | 13.04     | 3.70   |
| pmb0242 | Sinapoylcholine                   | Alkaloids | 0.94 | 9.81      | 3.29   |
| pma1840 | Coumaroyl choline                 | Alkaloids | 0.72 | 5.33      | 2.41   |
| pmf0124 | 2-Hydroxymelatonin                | Alkaloids | 0.60 | 2.15      | 1.10   |
| pmb2211 | Cocamidopropyl betaine            | Alkaloids | 0.49 | 1.77      | 0.83   |
| pme2812 | 6-Hydroxymelatonin                | Alkaloids | 0.77 | 1.69      | 0.76   |
| pmf0565 | L-Dencichin                       | Alkaloids | 1.14 | 1.56      | 0.64   |
| pmf0213 | Caffeine                          | Alkaloids | 0.53 | 1.47      | 0.55   |
| pme2268 | Trigonelline                      | Alkaloids | 0.24 | 1.07      | 0.09   |
| pmf0455 | Peimine                           | Alkaloids | 0.46 | 0.93      | -0.10  |
| pme1691 | Acetylcholine                     | Alkaloids | 0.35 | 0.93      | -0.10  |
| pmf0531 | N-Methylcytisine                  | Alkaloids | 1.13 | 0.70      | -0.51  |
| pmb0782 | Piperidine                        | Alkaloids | 0.89 | 0.63      | -0.66  |
| pme1453 | Melatonin                         | Alkaloids | 0.48 | 0.51      | -0.98  |
| pmf0384 | Nicotine                          | Alkaloids | 0.71 | 0.31      | -1.70  |
| pme2596 | 4-Pyridoxic acid                  | Alkaloids | 1.17 | 0.22      | -2.19  |
| pmf0436 | 1-Deoxynojirimycin                | Alkaloids | 0.75 | 0.20      | -2.36  |
| pmf0267 | Indole-3-carboxylic               | Alkaloids | 0.86 | 0.05      | -4.30  |
| pmf0336 | Indole-3-carboxylic acid          | Alkaloids | 0.86 | 0.05      | -4.37  |
| pmb1754 | O-Phosphocholine                  | Alkaloids | 1.13 | 0.04      | -4.52  |
| pma6270 | sn-Glycero-3-phosphocholine       | Alkaloids | 1.21 | 0.01      | -7.03  |
| pma2405 | Feruloylcholine                   | Alkaloids | 1.23 | 0.00      | -13.71 |
| pmf0386 | Prehelminthosporolactone          | Others    | 1.22 | 100555.56 | 16.62  |
| pmf0518 | Dehydrocostus lactone             | Others    | 1.23 | 23000.00  | 14.49  |
| pmf0437 | Harpagoside                       | Others    | 1.23 | 21592.59  | 14.40  |
| pma3499 | Digitoxigenine                    | Others    | 1.22 | 15959.26  | 13.96  |
| pmf0522 | alpha-Santonin                    | Others    | 1.23 | 13337.04  | 13.70  |
| pmf0516 | Mangiferin                        | Others    | 0.86 | 11037.37  | 13.43  |
| pmf0391 | Batatasin III                     | Others    | 1.23 | 6037.04   | 12.56  |
| pmf0387 | Dihydroprehelminthosporol         | Others    | 1.23 | 5074.07   | 12.31  |
| pmf0535 | Carvacrol                         | Others    | 1.23 | 1469.63   | 10.52  |
| pmf0580 | Carnosol                          | Others    | 0.72 | 8.83      | 3.14   |
| pme3705 | D-glucuronic acid                 | Others    | 1.21 | 3.82      | 1.93   |
| pmf0443 | Parthenolide                      | Others    | 0.64 | 2.93      | 1.55   |
| pmf0141 | 2-Phenylethanol                   | Others    | 1.04 | 1.57      | 0.65   |
| pmf0606 | Pectin (Technical Grade)          | Others    | 0.26 | 1.31      | 0.39   |
| pmf0506 | Ligustilide                       | Others    | 0.45 | 1.29      | 0.37   |
| pmf0243 | Benzyl $\beta$ -D-Glucopyranoside | Others    | 1.04 | 1.03      | 0.04   |
| pme3221 | Isoeugenol                        | Others    | 0.25 | 1.02      | 0.03   |
| pmb1452 | N-Lauryldiethanolamine            | Others    | 0.31 | 0.87      | -0.21  |
| pme2828 | 4-Nitrophenol                     | Others    | 0.75 | 0.86      | -0.21  |
| pmf0534 | Hinokitiol                        | Others    | 1.04 | 0.71      | -0.50  |
| pmf0349 | Vomifoliol                        | Others    | 0.41 | 0.60      | -0.73  |

|         |                                                    |           |      |          |        |
|---------|----------------------------------------------------|-----------|------|----------|--------|
| pme2253 | L-Gulonic- $\gamma$ -lactone                       | Others    | 1.11 | 0.55     | -0.87  |
| pme2830 | O-Phosphorylethanolamine                           | Others    | 0.69 | 0.26     | -1.96  |
| pme2831 | 1,1-Dimethylbiguanide                              | Others    | 0.97 | 0.07     | -3.75  |
| pmf0571 | 6-Aminopenicillanic acid                           | Others    | 0.97 | 0.06     | -4.07  |
| pmb2507 | 2-Deoxyribose 1-phosphate                          | Others    | 0.97 | 0.06     | -4.09  |
| pme0534 | Gluconic acid                                      | Others    | 1.20 | 0.05     | -4.31  |
| pmb3081 | Glucarate O-Phosphoric acid                        | Others    | 1.02 | 0.02     | -5.64  |
| pmf0217 | D-Glucose-6-phosphate disodium sal                 | Others    | 1.22 | 0.01     | -6.82  |
| pmb3079 | N-Acetylglucosamine 1-phosphate                    | Others    | 1.22 | 0.00     | -13.75 |
| pmf0418 | Curdione                                           | Others    | 1.23 | 0.00     | -15.28 |
| pmf0421 | Aloin A                                            | Quinones  | 1.23 | 6492.59  | 12.66  |
| pmf0546 | Emodin                                             | Quinones  | 0.47 | 0.92     | -0.11  |
| pmf0554 | Parietin                                           | Quinones  | 0.05 | 0.60     | -0.73  |
| pmf0541 | Shikonin                                           | Quinones  | 1.19 | 0.28     | -1.84  |
| pme1399 | Xanthohumol                                        | Flavanone | 1.23 | 7825.93  | 12.93  |
| pmf0058 | 4',5,7-Trihydroxyflavanone                         | Flavanone | 0.88 | 28.35    | 4.83   |
| pme2957 | Naringenin chalcone                                | Flavanone | 1.18 | 20.49    | 4.36   |
| pme0376 | Naringenin                                         | Flavanone | 1.18 | 17.86    | 4.16   |
| pme1598 | Hesperetin 5-O-glucoside                           | Flavanone | 0.02 | 1.17     | 0.23   |
| pme3440 | Butein                                             | Flavanone | 0.81 | 1.10     | 0.14   |
| pma0791 | Naringenin O-malonylhexoside                       | Flavanone | 0.04 | 0.65     | -0.63  |
| pme0330 | Naringenin 7-O-neohesperidoside<br>(Naringin)      | Flavanone | 0.74 | 0.45     | -1.15  |
| pme0001 | Hesperetin 7-O-neohesperidoside<br>(Neohesperidin) | Flavanone | 0.79 | 0.45     | -1.15  |
| pme3461 | Homoeriodictyol                                    | Flavanone | 1.15 | 0.34     | -1.55  |
| pme2949 | Hesperetin 7-rutinoside (Hesperidin)               | Flavanone | 1.09 | 0.24     | -2.07  |
| pme1599 | 7-O-Methyleeriodictyol                             | Flavanone | 1.07 | 0.23     | -2.09  |
| pme3282 | Afzelechin<br>(3,5,7,4'-Tetrahydroxyflavan)        | Flavanone | 1.01 | 0.03     | -5.15  |
| pme3235 | Liquiritigenin                                     | Flavanone | 1.22 | 0.00     | -10.98 |
| pmf0582 | Glabridin                                          | Flavonoid | 1.23 | 48370.37 | 15.56  |
| pmf0551 | Tectochrysin                                       | Flavonoid | 1.23 | 44629.63 | 15.45  |
| pmf0568 | Tectorigenin                                       | Flavonoid | 1.23 | 26111.11 | 14.67  |
| pmf0246 | Orientin                                           | Flavonoid | 1.23 | 23074.07 | 14.49  |
| pmf0611 | Chalcone                                           | Flavonoid | 1.22 | 10122.22 | 13.31  |
| pmf0493 | Puararin                                           | Flavonoid | 1.23 | 4048.15  | 11.98  |
| pmf0549 | Diosmin                                            | Flavonoid | 1.23 | 2848.15  | 11.48  |
| pmf0393 | Persicogenin                                       | Flavonoid | 0.95 | 11.45    | 3.52   |
| pmf0370 | Persicoside                                        | Flavonoid | 0.07 | 2.53     | 1.34   |
| pmf0471 | Apiin                                              | Flavonoid | 0.31 | 1.86     | 0.89   |
| pmf0372 | Pedalitin                                          | Flavonoid | 0.81 | 1.72     | 0.78   |
| pme1665 | Isovitexin 7-O-glucoside (Saponarin)               | Flavonoid | 0.15 | 0.94     | -0.09  |
| pmf0362 | Hydroxygenkwanin                                   | Flavonoid | 0.40 | 0.67     | -0.57  |
| pmf0204 | Hyperoside                                         | Flavonoid | 0.50 | 0.51     | -0.96  |
| pmf0265 | 5,7-Dihydroxychromone                              | Flavonoid | 1.09 | 0.49     | -1.03  |
| pmf0208 | Isoquercitroside                                   | Flavonoid | 0.64 | 0.33     | -1.58  |
| pmf0109 | 3-O-Acetylpinobanksin                              | Flavonoid | 0.66 | 0.32     | -1.65  |



|         |                                                       |           |      |            |        |
|---------|-------------------------------------------------------|-----------|------|------------|--------|
| pmf0274 | Herbacetin                                            | Flavonoid | 1.17 | 0.23       | -2.13  |
| pmf0179 | Narcissoside                                          | Flavonoid | 1.11 | 0.14       | -2.83  |
| pmf0464 | Farrerol                                              | Flavonoid | 1.09 | 0.14       | -2.84  |
| pmf0374 | Isorhamnetin 3-O-glucoside                            | Flavonoid | 1.23 | 0.00       | -14.36 |
| pma6389 | Ayanin                                                | Flavonol  | 1.23 | 708148.15  | 19.43  |
| pme1478 | Myricetin                                             | Flavonol  | 1.23 | 50074.07   | 15.61  |
| pme3137 | 3-Hydroxyflavone                                      | Flavonol  | 1.23 | 36000.00   | 15.14  |
| pme2963 | Aromadedrin (Dihydrokaempferol)                       | Flavonol  | 1.23 | 35185.19   | 15.10  |
| pme3372 | Rhamnetin (7-O-methxyl quercetin)                     | Flavonol  | 1.23 | 16259.26   | 13.99  |
| pme2898 | Dihydromyricetin                                      | Flavonol  | 0.97 | 18.54      | 4.21   |
| pme1588 | Isorhamnetin                                          | Flavonol  | 1.14 | 13.00      | 3.70   |
| pme3288 | 3,7-Di-O-methylquercetin                              | Flavonol  | 1.06 | 7.16       | 2.84   |
| pme3514 | Morin                                                 | Flavonol  | 0.87 | 3.37       | 1.75   |
| pme3404 | Syringetin                                            | Flavonol  | 0.86 | 2.76       | 1.46   |
| pme3212 | Quercetin 3-O-glucoside (Isotrifoliin                 | Flavonol  | 0.54 | 2.47       | 1.30   |
| pme3267 | kaempferol 3-O-galactoside (Trifolir                  | Flavonol  | 0.97 | 2.14       | 1.10   |
| pme1622 | kaempferol 3-O-glucoside (Astragali                   | Flavonol  | 0.89 | 1.94       | 0.95   |
| pme3410 | Laricitrin                                            | Flavonol  | 1.04 | 1.87       | 0.90   |
| pme0199 | Quercetin                                             | Flavonol  | 0.72 | 1.40       | 0.48   |
| pme3129 | quercetin 4'-O-glucoside (Spiraeoside                 | Flavonol  | 0.06 | 1.22       | 0.28   |
| pme1500 | Kumatakenin                                           | Flavonol  | 0.53 | 0.65       | -0.62  |
| pme0197 | Quercetin 3-O-rutinoside (Rutin)                      | Flavonol  | 0.52 | 0.60       | -0.75  |
| pme3297 | Kaempferol 3-O-rhamnoside<br>(Kaempferin)             | Flavonol  | 0.98 | 0.58       | -0.78  |
| pme3468 | Kaempferol-3-O-robinoside-7-O-<br>rhamnoside(Robinin) | Flavonol  | 0.82 | 0.34       | -1.57  |
| pmb3894 | Di-O-methylquercetin                                  | Flavonol  | 1.16 | 0.32       | -1.63  |
| pme0321 | Kaempferol 7-O-rhamnoside                             | Flavonol  | 1.21 | 0.21       | -2.25  |
| pme1605 | Kaempferol 3-O-robinobioside<br>(Biorobin)            | Flavonol  | 1.18 | 0.19       | -2.38  |
| pme0369 | kaempferol 3-O-rutinoside (Nicotiflor                 | Flavonol  | 1.15 | 0.19       | -2.40  |
| pme3393 | Fustin                                                | Flavonol  | 1.20 | 0.19       | -2.43  |
| pme1539 | Isorhamnetin 3-O-neohesperidoside                     | Flavonol  | 1.16 | 0.14       | -2.80  |
| pma6639 | Isorhamnetin O-hexoside                               | Flavonol  | 1.23 | 0.00       | -14.31 |
| pmb0595 | Isorhamnetin 5-O-hexoside                             | Flavonol  | 1.23 | 0.00       | -14.51 |
| pmb0675 | C-pentosyl-apigenin<br>O-p-coumaroylhexoside          | Flavone   | 1.23 | 2051851.85 | 20.97  |
| pma6360 | O-methylChrysoeriol 8-C-hexoside                      | Flavone   | 1.23 | 131111.11  | 17.00  |
| pma6199 | Chrysin O-hexoside                                    | Flavone   | 1.23 | 119259.26  | 16.86  |
| pmb0566 | Luteolin O-hexosyl-O-pentoside                        | Flavone   | 1.22 | 80074.07   | 16.29  |
| pma6638 | O-methylChrysoeriol 7-O-hexoside                      | Flavone   | 1.23 | 75259.26   | 16.20  |
| pma0253 | O-methylChrysoeriol 5-O-hexoside                      | Flavone   | 1.22 | 69925.93   | 16.09  |
| pmb0623 | 6-C-hexosyl chrysoeriol O-hexoside                    | Flavone   | 1.23 | 38962.96   | 15.25  |
| pmb0674 | C-pentosyl apigenin<br>O-salicyloyl hexoside          | Flavone   | 1.22 | 38629.63   | 15.24  |
| pmb3046 | Tricin 7-O-hexoside                                   | Flavone   | 1.22 | 36296.30   | 15.15  |
| pmb0621 | C-hexosyl-isorhamnetin O-hexoside                     | Flavone   | 1.23 | 32814.81   | 15.00  |
| pmb0358 | Selgin O-hexosyl-O-hexoside                           | Flavone   | 1.23 | 25481.48   | 14.64  |

|         |                                               |              |      |           |        |
|---------|-----------------------------------------------|--------------|------|-----------|--------|
| pmb3053 | Tricin O-eudesmic acid                        | Flavone      | 1.22 | 21555.56  | 14.40  |
| pmb0724 | Tricin O-rhamnoside                           | Flavone      | 1.23 | 12848.15  | 13.65  |
| pmb3051 | Tricin 4'-O-syringyl alcohol                  | Flavone      | 0.86 | 12737.37  | 13.64  |
| pmb3052 | Tricin 4'-O- $\beta$ -guaiacylglycerol        | Flavone      | 1.21 | 8200.00   | 13.00  |
| pme1662 | sakuranetin                                   | Flavone      | 0.87 | 5926.26   | 12.53  |
| pmb0571 | Apigenin O-hexosyl-O-pentoside                | Flavone      | 1.22 | 4907.41   | 12.26  |
| pme1611 | Isohemiphloin                                 | Flavone      | 1.23 | 3637.04   | 11.83  |
| pmb0720 | Tricin O-malonylhexoside                      | Flavone      | 0.87 | 2618.85   | 11.35  |
| pmb0580 | Chrysin 5-O-glucoside (Toringin)              | Flavone      | 1.03 | 71.33     | 6.16   |
| pmb0717 | Tricin 5-O- $\beta$ -guaiacylglycerol         | Flavone      | 1.17 | 39.99     | 5.32   |
| pme3473 | Butin                                         | Flavone      | 0.88 | 26.95     | 4.75   |
| pmf0057 | 4,2',4',6'-Tetrahydroxychalcone               | Flavone      | 1.19 | 23.28     | 4.54   |
| pme0089 | Luteolin                                      | Flavone      | 0.98 | 20.48     | 4.36   |
| pme0324 | Chrysin                                       | Flavone      | 0.97 | 18.22     | 4.19   |
| pmb0735 | Tricin O-glucuronic acid                      | Flavone      | 0.50 | 10.04     | 3.33   |
| pma6218 | O-methylnaringenin C-pentoside                | Flavone      | 1.21 | 5.66      | 2.50   |
| pma6576 | Spinacetin                                    | Flavone      | 0.99 | 3.00      | 1.58   |
| pme2457 | Luteolin 7-O-glucoside (Cynaroside)           | Flavone      | 0.64 | 2.83      | 1.50   |
| pmb2981 | Apigenin C-hexosyl-O-rutinoside               | Flavone      | 1.06 | 2.27      | 1.19   |
| pme0359 | Apigenin 5-O-glucoside                        | Flavone      | 1.18 | 1.78      | 0.84   |
| pmb0605 | Apigenin 7-O-glucoside (Cosmosiin)            | Flavone      | 1.15 | 1.77      | 0.82   |
| pme1518 | Nobiletin                                     | Flavone      | 0.67 | 1.57      | 0.65   |
| pmb0676 | 8-C-hexosyl-chrysoeriol<br>O-feruloylhexoside | Flavone      | 0.40 | 1.45      | 0.53   |
| pmb2850 | Tricin                                        | Flavone      | 0.32 | 1.37      | 0.45   |
| pme1550 | Tangeretin                                    | Flavone      | 0.13 | 1.13      | 0.17   |
| pmb0678 | 8-C-hexosyl-apigenin<br>O-feruloylhexoside    | Flavone      | 0.00 | 1.09      | 0.12   |
| pmf0011 | Apigenin 6,8-C-diglucoside                    | Flavone      | 0.01 | 1.05      | 0.07   |
| pme0374 | Isovitexin                                    | Flavone      | 0.08 | 0.99      | -0.02  |
| pmb0624 | 6-C-hexosyl-luteolin O-hexoside               | Flavone      | 0.33 | 0.82      | -0.29  |
| pma3443 | Tricin 7-O-acetylglucoside                    | Flavone      | 0.87 | 0.64      | -0.64  |
| pmb0628 | Eriodictiol C-hexosyl-O-hexoside              | Flavone      | 0.03 | 0.55      | -0.87  |
| pmf0005 | Narirutin                                     | Flavone      | 0.78 | 0.51      | -0.97  |
| pma6558 | Velutin                                       | Flavone      | 0.84 | 0.48      | -1.05  |
| pma1108 | Apigenin C-glucoside                          | Flavone      | 0.60 | 0.44      | -1.17  |
| pme1541 | Acacetin                                      | Flavone      | 0.99 | 0.42      | -1.24  |
| pma6496 | Luteolin 6-C-glucoside                        | Flavone      | 0.63 | 0.37      | -1.45  |
| pme0363 | Chrysoeriol                                   | Flavone      | 1.10 | 0.36      | -1.47  |
| pme0379 | Apigenin                                      | Flavone      | 1.20 | 0.30      | -1.72  |
| pme3300 | Tricetin                                      | Flavone      | 1.15 | 0.20      | -2.29  |
| pmb0588 | Luteolin 3',7-di-O-glucoside                  | Flavone      | 1.23 | 0.00      | -12.42 |
| pma0294 | Chrysoeriol 5-O-hexoside                      | Flavone      | 1.23 | 0.00      | -14.29 |
| pmb0607 | Chrysoeriol 7-O-hexoside                      | Flavone      | 1.23 | 0.00      | -14.34 |
| pmb0696 | 8-C-hexosyl chrysoeriol O-hexoside            | Flavone      | 1.23 | 0.00      | -15.69 |
| pme0444 | Malvidin 3-O-glucoside (Oenin)                | Anthocyanins | 1.23 | 130888.89 | 17.00  |
| pme0443 | Malvidin 3-O-galactoside                      | Anthocyanins | 1.22 | 101592.59 | 16.63  |
| pmb0550 | Cyanidin 3-O-glucoside (Kuromanin)            | Anthocyanins | 0.88 | 1.56      | 0.64   |

|         |                                              |                            |      |          |        |
|---------|----------------------------------------------|----------------------------|------|----------|--------|
| pme3256 | Delphinidin 3-O-rutinoside (Tulipani         | Anthocyanins               | 0.55 | 1.55     | 0.63   |
| pme1397 | Pelargonidin                                 | Anthocyanins               | 0.56 | 0.57     | -0.81  |
| pmb0542 | Cyanidin 3-O-malonylhexoside                 | Anthocyanins               | 1.23 | 0.00     | -14.63 |
| pme2776 | 2'-Deoxyinosine                              | Nucleotide and derivatives | 1.23 | 35296.30 | 15.11  |
| pme0256 | Xanthine                                     | Nucleotide and derivatives | 1.21 | 20.14    | 4.33   |
| pmc0281 | Adenosine O-ribose                           | Nucleotide and derivatives | 1.22 | 8.86     | 3.15   |
| pme3965 | 2-(dimethylamino)guanosine                   | Nucleotide and derivatives | 1.13 | 3.80     | 1.93   |
| pme1376 | 2'-Deoxycytidine-5'-monophosphate            | Nucleotide and derivatives | 0.59 | 2.09     | 1.06   |
| pme0130 | 3-Methylxanthine                             | Nucleotide and derivatives | 0.99 | 1.40     | 0.48   |
| pme2798 | 7-Methylxanthine                             | Nucleotide and derivatives | 0.81 | 1.36     | 0.44   |
| pme1119 | Inosine                                      | Nucleotide and derivatives | 0.57 | 1.15     | 0.21   |
| pme0257 | Uracil                                       | Nucleotide and derivatives | 0.02 | 1.00     | 0.01   |
| pme0108 | 5-Methylcytosine                             | Nucleotide and derivatives | 0.38 | 0.75     | -0.41  |
| pmc0274 | 6-Methylmercaptapurine                       | Nucleotide and derivatives | 0.95 | 0.70     | -0.52  |
| pme3200 | 1-methylguanidine                            | Nucleotide and derivatives | 1.16 | 0.69     | -0.53  |
| pmc0066 | 2'-Deoxyinosine-5'-monophosphate             | Nucleotide and derivatives | 1.04 | 0.50     | -1.00  |
| pme0038 | Cytosine                                     | Nucleotide and derivatives | 1.12 | 0.42     | -1.24  |
| pmb0964 | iP7G                                         | Nucleotide and derivatives | 1.20 | 0.35     | -1.53  |
| pmb2922 | Uridine 5'-diphospho-D-glucose               | Nucleotide and derivatives | 1.20 | 0.20     | -2.29  |
| pmc0304 | Succinyladenosine                            | Nucleotide and derivatives | 1.08 | 0.20     | -2.33  |
| pme3336 | N6-Succinyl Adenosine                        | Nucleotide and derivatives | 1.11 | 0.19     | -2.40  |
| pme3188 | Uridine 5'-monophosphate                     | Nucleotide and derivatives | 1.19 | 0.17     | -2.52  |
| pmf0059 | UDP- $\alpha$ -D-glucose                     | Nucleotide and derivatives | 1.21 | 0.17     | -2.59  |
| pme1097 | Adenine                                      | Nucleotide and derivatives | 1.22 | 0.16     | -2.60  |
| pme3961 | Deoxyadenosine                               | Nucleotide and derivatives | 0.94 | 0.16     | -2.65  |
| pmf0118 | Uridine 5'-diphosphoglucose disodium         | Nucleotide and derivatives | 1.22 | 0.14     | -2.82  |
| pme0183 | 2-Hydroxy-6-aminopurine                      | Nucleotide and derivatives | 1.20 | 0.14     | -2.89  |
| pme1109 | Guanine                                      | Nucleotide and derivatives | 1.20 | 0.13     | -2.92  |
| pme0163 | $\beta$ -Nicotinamide mononucleotide         | Nucleotide and derivatives | 0.96 | 0.11     | -3.20  |
| pme0033 | Hypoxanthine                                 | Nucleotide and derivatives | 1.22 | 0.09     | -3.51  |
| pme3835 | Guanosine 3',5'-cyclic monophosphate         | Nucleotide and derivatives | 0.97 | 0.07     | -3.94  |
| pme2282 | Guanosine monophosphate                      | Nucleotide and derivatives | 0.99 | 0.06     | -4.12  |
| pmb0981 | Adenosine 5'-monophosphate                   | Nucleotide and derivatives | 1.21 | 0.03     | -5.08  |
| pme3732 | Cytidine                                     | Nucleotide and derivatives | 1.00 | 0.03     | -5.09  |
| pmb0514 | Adenosine 3'-monophosphate                   | Nucleotide and derivatives | 1.22 | 0.03     | -5.31  |
| pme1175 | Guanosine                                    | Nucleotide and derivatives | 1.03 | 0.02     | -5.45  |
| pmb4344 | Guanosine 5'-monophosphate                   | Nucleotide and derivatives | 1.06 | 0.02     | -5.71  |
| pme1063 | Uridine                                      | Nucleotide and derivatives | 1.19 | 0.02     | -5.76  |
| pmb0532 | Inosine 5'-monophosphate                     | Nucleotide and derivatives | 1.06 | 0.01     | -6.52  |
| pme1474 | 5'-Deoxy-5'-(methylthio)adenosine            | Nucleotide and derivatives | 0.87 | 0.00     | -11.84 |
| pme3983 | Hypoxanthine-9- $\beta$ -D-arabinofuranoside | Nucleotide and derivatives | 0.86 | 0.00     | -13.14 |
| pmd0023 | Adenosine                                    | Nucleotide and derivatives | 1.23 | 0.00     | -13.61 |
| pme2879 | 5-Hydroxymethyluracil                        | Nucleotide and derivatives | 1.23 | 0.00     | -14.01 |
| pme3174 | Uridine 5'-monophosphate (Cytidylic acid)    | Nucleotide and derivatives | 1.22 | 0.00     | -14.58 |
| pme1294 | Xanthosine                                   | Nucleotide and derivatives | 1.23 | 0.00     | -14.67 |
| pme3197 | Cyclic AMP                                   | Nucleotide and derivatives | 1.22 | 0.00     | -16.33 |
| pmb0130 | N-Acetyl tryptamine                          | Phenolamides               | 0.89 | 59.70    | 5.90   |
| pma1839 | N-sinapoyl cadaverine                        | Phenolamides               | 1.03 | 54.94    | 5.78   |

|         |                                   |                  |      |           |        |
|---------|-----------------------------------|------------------|------|-----------|--------|
| pmb0496 | N-Feruloyl agmatine               | Phenolamides     | 0.64 | 2.76      | 1.46   |
| pmb0493 | N'-p-Coumaroyl agmatine           | Phenolamides     | 0.03 | 1.03      | 0.04   |
| pmb0501 | Agmatine                          | Phenolamides     | 0.38 | 0.95      | -0.08  |
| pmd0017 | Spermine                          | Phenolamides     | 1.21 | 0.30      | -1.71  |
| pmb0488 | Spermidine                        | Phenolamides     | 1.15 | 0.26      | -1.93  |
| pme2247 | Ellagic acid                      | Polyphenol       | 1.22 | 162481.48 | 17.31  |
| pmf0453 | Demethoxycurcumin                 | Polyphenol       | 1.23 | 17407.41  | 14.09  |
| pme2478 | Protocatechuic aldehyde           | Polyphenol       | 1.13 | 3.33      | 1.74   |
| pme1824 | Protocatechuic acid               | Polyphenol       | 1.17 | 3.31      | 1.73   |
| pme0450 | L-Epicatechin                     | Polyphenol       | 0.18 | 0.88      | -0.19  |
| pme0205 | Catechin                          | Polyphenol       | 0.34 | 0.68      | -0.56  |
| pme1564 | Epicatechin gallate (ECG)         | Polyphenol       | 0.33 | 0.62      | -0.69  |
| pme0426 | 4-Methylcatechol                  | Polyphenol       | 0.92 | 0.22      | -2.16  |
| pmf0458 | 6-Gingerol                        | Polyphenol       | 0.94 | 0.07      | -3.89  |
| pmb2831 | Protocatechuic acid O-glucoside   | Polyphenol       | 1.22 | 0.00      | -17.62 |
| pmf0122 | 1,10-decanediol                   | Alcohols         | 1.22 | 59000.00  | 15.85  |
| pmb0767 | D-erythro-Dihydrosphingosine      | Alcohols         | 1.22 | 28592.59  | 14.80  |
| pme0516 | Inositol                          | Alcohols         | 1.22 | 7.30      | 2.87   |
| pme2237 | Dulcitol                          | Alcohols         | 1.16 | 2.69      | 1.43   |
| pme0499 | D-Sorbitol                        | Alcohols         | 1.14 | 2.68      | 1.42   |
| pme0513 | Xylitol                           | Alcohols         | 0.99 | 1.84      | 0.88   |
| pme2134 | DL-threitol                       | Alcohols         | 0.03 | 1.16      | 0.21   |
| pmf0256 | 3-Methyl-1-pentanol               | Alcohols         | 0.24 | 0.96      | -0.06  |
| pme2256 | D-Arabitol                        | Alcohols         | 0.70 | 0.80      | -0.33  |
| pme1261 | Pantothenol                       | Alcohols         | 0.66 | 0.79      | -0.33  |
| pmf0388 | Dehydrovomifoliol                 | Alcohols         | 0.97 | 0.45      | -1.15  |
| pma2987 | Histidinol                        | Alcohols         | 1.18 | 0.42      | -1.25  |
| pme2636 | Enterodiol                        | Alcohols         | 1.21 | 0.39      | -1.37  |
| pme2529 | 1,5-Anhydro-D-glucitol            | Alcohols         | 1.15 | 0.34      | -1.55  |
| pme1944 | D-Mannitol                        | Alcohols         | 1.20 | 0.19      | -2.36  |
| pmf0175 | 2-Decanol                         | Alcohols         | 1.22 | 0.12      | -3.02  |
| pmf0174 | 1-Decanol                         | Alcohols         | 1.22 | 0.12      | -3.03  |
| pmf0068 | Mannitol                          | Alcohols         | 0.79 | 0.10      | -3.30  |
| pmf0348 | 2,6-Dimethyl-7-octene-2,3,6-triol | Alcohols         | 1.22 | 0.00      | -7.64  |
| pmf0173 | 1,2-Decanediol                    | Alcohols         | 1.23 | 0.00      | -18.44 |
| pmf0010 | Xanthoxol                         | Phenylpropanoids | 1.23 | 555925.93 | 19.08  |
| pmf0164 | Schizandrin B                     | Phenylpropanoids | 1.23 | 200740.74 | 17.61  |
| pmf0404 | Ethyl cinnamate                   | Phenylpropanoids | 1.23 | 81074.07  | 16.31  |
| pmf0479 | 8-Methoxypsoralen                 | Phenylpropanoids | 1.23 | 54333.33  | 15.73  |
| pme3553 | Psoralen                          | Phenylpropanoids | 1.22 | 51148.15  | 15.64  |
| pme2987 | 3,4-Dihydrocoumarin               | Phenylpropanoids | 1.22 | 39407.41  | 15.27  |
| pme1458 | Resveratrol                       | Phenylpropanoids | 1.23 | 20925.93  | 14.35  |
| pmb0382 | O-Feruloyl 4-hydroxycoumarin      | Phenylpropanoids | 1.23 | 19629.63  | 14.26  |
| pmf0525 | Imperatorin                       | Phenylpropanoids | 1.23 | 18629.63  | 14.19  |
| pmf0526 | Isoimperatorin                    | Phenylpropanoids | 1.23 | 16851.85  | 14.04  |
| pmb1178 | O-Feruloyl 2-hydroxycoumarin      | Phenylpropanoids | 1.23 | 16222.22  | 13.99  |
| pme1472 | Vanillic acid                     | Phenylpropanoids | 1.23 | 14666.67  | 13.84  |
| pmf0527 | Osthole                           | Phenylpropanoids | 1.22 | 14318.52  | 13.81  |

|         |                                           |                            |      |          |        |
|---------|-------------------------------------------|----------------------------|------|----------|--------|
| pme0299 | trans-Cinnamate                           | Phenylpropanoids           | 1.23 | 12222.22 | 13.58  |
| pmf0543 | Podophyllotoxin                           | Phenylpropanoids           | 1.01 | 61.22    | 5.94   |
| pmf0563 | Magnolol                                  | Phenylpropanoids           | 0.85 | 40.94    | 5.36   |
| pmf0320 | Acetosyringone                            | Phenylpropanoids           | 1.00 | 27.99    | 4.81   |
| pme0429 | 3,4,5-Trimethoxycinnamic acid             | Phenylpropanoids           | 0.95 | 11.76    | 3.56   |
| pme3453 | p-Coumaraldehyde                          | Phenylpropanoids           | 1.18 | 8.36     | 3.06   |
| pme0418 | 3-(4-Hydroxyphenyl)propionic acid         | Phenylpropanoids           | 0.76 | 7.97     | 2.99   |
| pme3305 | p-Coumaryl alcohol                        | Phenylpropanoids           | 1.11 | 7.57     | 2.92   |
| pmf0270 | (E)-p-coumaric acid                       | Phenylpropanoids           | 1.17 | 7.55     | 2.92   |
| pme0303 | Caffeate                                  | Phenylpropanoids           | 1.20 | 7.49     | 2.90   |
| pme3422 | 6-Methoxy-7,8-DihydroxyCoumarin           | Phenylpropanoids           | 0.76 | 6.77     | 2.76   |
| pmf0165 | Schisandrin C                             | Phenylpropanoids           | 1.20 | 5.36     | 2.42   |
| pmf0586 | Schizandrin C                             | Phenylpropanoids           | 1.18 | 4.87     | 2.28   |
| pme1436 | p-Coumaric acid                           | Phenylpropanoids           | 1.19 | 4.22     | 2.08   |
| pmb0108 | Feruloyl syringic acid                    | Phenylpropanoids           | 0.64 | 4.07     | 2.02   |
| pmf0298 | Pyrocatechol                              | Phenylpropanoids           | 0.80 | 2.35     | 1.23   |
| pmf0354 | Catechol                                  | Phenylpropanoids           | 0.76 | 2.25     | 1.17   |
| pmf0062 | Verbascoside                              | Phenylpropanoids           | 0.14 | 2.17     | 1.12   |
| pme3143 | 6-Hydroxy-4-methylcoumarin                | Phenylpropanoids           | 0.83 | 1.74     | 0.80   |
| pmf0067 | Isoacteoside                              | Phenylpropanoids           | 0.31 | 1.74     | 0.80   |
| pme3242 | Medicarpin                                | Phenylpropanoids           | 0.37 | 1.26     | 0.33   |
| pme1638 | sesamolin                                 | Phenylpropanoids           | 1.11 | 1.04     | 0.06   |
| pme1637 | Coniferyl alcohol                         | Phenylpropanoids           | 0.16 | 1.04     | 0.05   |
| pmb2835 | Syringaldehyde                            | Phenylpropanoids           | 0.32 | 0.92     | -0.11  |
| pmf0605 | Notopterol                                | Phenylpropanoids           | 0.78 | 0.80     | -0.32  |
| pmf0609 | Umbelliferone                             | Phenylpropanoids           | 0.62 | 0.63     | -0.67  |
| pme3564 | Daphnetin                                 | Phenylpropanoids           | 1.07 | 0.60     | -0.74  |
| pmf0284 | 4-Hydroxy-3-methoxycinnamaldehyde         | Phenylpropanoids           | 1.01 | 0.56     | -0.83  |
| pme0305 | Ferulic acid                              | Phenylpropanoids           | 0.99 | 0.48     | -1.06  |
| pme0422 | 3-Hydroxy-4-methoxycinnamic acid          | Phenylpropanoids           | 1.00 | 0.46     | -1.13  |
| pme3419 | Esculetin (6,7-dihydroxycoumarin)         | Phenylpropanoids           | 1.21 | 0.40     | -1.33  |
| pmf0572 | Paeonol                                   | Phenylpropanoids           | 1.00 | 0.40     | -1.33  |
| pme1646 | Pinoresinol                               | Phenylpropanoids           | 0.38 | 0.39     | -1.37  |
| pme2996 | 4-Hydroxycoumarin                         | Phenylpropanoids           | 0.86 | 0.35     | -1.51  |
| pme3131 | 6,7-Dimethoxy-4-methylcoumarin            | Phenylpropanoids           | 0.63 | 0.31     | -1.67  |
| pme1695 | Sinapic acid                              | Phenylpropanoids           | 0.71 | 0.22     | -2.15  |
| pme0387 | Homovanillic acid                         | Phenylpropanoids           | 1.18 | 0.21     | -2.26  |
| pme3443 | Sinapinaldehyde                           | Phenylpropanoids           | 1.20 | 0.12     | -3.09  |
| pmf0326 | Apocynin                                  | Phenylpropanoids           | 1.03 | 0.01     | -6.18  |
| pmf0456 | 8-GINGEROL                                | Phenylpropanoids           | 0.86 | 0.00     | -8.28  |
| pmf0098 | trans-4-Hydroxycinnamic acid Methyl Ester | Phenylpropanoids           | 1.23 | 0.00     | -12.76 |
| pme3246 | Coniferin                                 | Phenylpropanoids           | 0.86 | 0.00     | -13.33 |
| pme0391 | 4-Methylumbelliferone                     | Phenylpropanoids           | 1.23 | 0.00     | -16.80 |
| pmf0292 | D-erythro-sphinganine                     | Amino acid and derivatives | 1.23 | 26555.56 | 14.70  |
| pme0195 | L-Cysteine                                | Amino acid and derivatives | 1.21 | 5.25     | 2.39   |
| pmf0442 | N-Acetyl-L-phenylalanine                  | Amino acid and derivatives | 0.70 | 3.65     | 1.87   |
| pme2758 | 4-Hydroxy-L-glutamic acid                 | Amino acid and derivatives | 0.60 | 2.68     | 1.42   |

|         |                                                      |                            |      |      |       |
|---------|------------------------------------------------------|----------------------------|------|------|-------|
| pmf0588 | Aspartic acid                                        | Amino acid and derivatives | 0.75 | 1.81 | 0.86  |
| pmf0585 | Proline                                              | Amino acid and derivatives | 0.36 | 1.36 | 0.44  |
| pme0122 | N6-Acetyl-L-lysine                                   | Amino acid and derivatives | 0.49 | 1.36 | 0.44  |
| pmb2873 | 3-(2-Naphthyl)-D-alanine                             | Amino acid and derivatives | 0.40 | 1.35 | 0.43  |
| pme0109 | (-)-3-(3,4-Dihydroxyphenyl)-2-methylalanine          | Amino acid and derivatives | 0.53 | 1.27 | 0.35  |
| pme0037 | L-Histidine                                          | Amino acid and derivatives | 0.50 | 1.19 | 0.26  |
| pme0009 | L-Serine                                             | Amino acid and derivatives | 0.07 | 1.05 | 0.07  |
| pme0020 | L-Phenylalanine                                      | Amino acid and derivatives | 0.02 | 1.02 | 0.02  |
| pme0128 | D-Alanyl-D-Alanine                                   | Amino acid and derivatives | 0.04 | 0.99 | -0.01 |
| pme2527 | L(+)-Ornithine                                       | Amino acid and derivatives | 0.01 | 0.99 | -0.02 |
| pme0015 | L(-)-Cystine                                         | Amino acid and derivatives | 0.17 | 0.98 | -0.03 |
| pme0007 | L-Citrulline                                         | Amino acid and derivatives | 0.05 | 0.96 | -0.06 |
| pme0022 | L-Threonine                                          | Amino acid and derivatives | 0.26 | 0.93 | -0.10 |
| pme2790 | N- $\gamma$ -Acetyl-N-2-Formyl-5-methoxykynurenamine | Amino acid and derivatives | 0.11 | 0.90 | -0.16 |
| pme0226 | L-Asparagine                                         | Amino acid and derivatives | 0.34 | 0.90 | -0.16 |
| pme0075 | N-Acetyl-L-glutamic acid                             | Amino acid and derivatives | 0.66 | 0.87 | -0.20 |
| pmf0594 | D-(+)-Phenylalanine                                  | Amino acid and derivatives | 0.46 | 0.86 | -0.22 |
| pme1239 | S-(methyl)glutathione                                | Amino acid and derivatives | 0.58 | 0.83 | -0.27 |
| pme0042 | L-(+)-Arginine                                       | Amino acid and derivatives | 0.93 | 0.75 | -0.42 |
| pme0030 | L(-)-Tyrosine                                        | Amino acid and derivatives | 0.70 | 0.73 | -0.46 |
| pme0050 | L-Tryptophan                                         | Amino acid and derivatives | 0.75 | 0.71 | -0.49 |
| pme1712 | L-Saccharopine                                       | Amino acid and derivatives | 0.95 | 0.67 | -0.58 |
| pme0011 | L-Aspartic acid                                      | Amino acid and derivatives | 0.74 | 0.67 | -0.58 |
| pme0026 | L-(+)-Lysine                                         | Amino acid and derivatives | 1.09 | 0.63 | -0.67 |
| pme0013 | L-Glutamic acid                                      | Amino acid and derivatives | 0.88 | 0.59 | -0.76 |
| pme2122 | Histamine                                            | Amino acid and derivatives | 0.91 | 0.58 | -0.78 |
| pme0161 | L-Homoserine                                         | Amino acid and derivatives | 1.11 | 0.58 | -0.80 |
| pmf0589 | Glutamic acid                                        | Amino acid and derivatives | 0.93 | 0.55 | -0.85 |
| pme1872 | L-Proline                                            | Amino acid and derivatives | 1.15 | 0.54 | -0.90 |
| pme1368 | L-Pipecolic acid                                     | Amino acid and derivatives | 0.94 | 0.52 | -0.94 |
| pme1408 | L-Glutamine                                          | Amino acid and derivatives | 1.12 | 0.52 | -0.95 |
| pme0279 | 2,6-Diaminoimelic acid                               | Amino acid and derivatives | 1.15 | 0.47 | -1.08 |
| pme2617 | Methionine sulfoxide                                 | Amino acid and derivatives | 1.23 | 0.36 | -1.46 |
| pmb2857 | L-Glutamic acid O-glucoside                          | Amino acid and derivatives | 1.19 | 0.34 | -1.57 |
| pmb2855 | L-Glutamine O-hexside                                | Amino acid and derivatives | 1.22 | 0.30 | -1.74 |
| pme3382 | N-Acetylthreonine                                    | Amino acid and derivatives | 0.67 | 0.29 | -1.77 |
| pme0137 | N $\alpha$ -Acetyl-L-glutamine                       | Amino acid and derivatives | 1.19 | 0.27 | -1.89 |
| pmb0962 | Lysine butyrate                                      | Amino acid and derivatives | 1.04 | 0.11 | -3.16 |
| pme2634 | DL-Norvaline                                         | Amino acid and derivatives | 0.95 | 0.10 | -3.26 |
| pme0039 | L-Valine                                             | Amino acid and derivatives | 0.95 | 0.09 | -3.43 |
| pme0116 | L-Carnosine                                          | Amino acid and derivatives | 0.83 | 0.08 | -3.67 |
| pmb0449 | 2-Aminoadipic acid (L-Homoglutamic acid)             | Amino acid and derivatives | 0.99 | 0.04 | -4.68 |
| pme2914 | 3-Hydroxy-3-methylpentane-1,5-dioic acid             | Amino acid and derivatives | 0.99 | 0.04 | -4.74 |
| pme0004 | L-Homocitrulline                                     | Amino acid and derivatives | 1.03 | 0.02 | -5.58 |

|         |                                    |                            |      |      |        |
|---------|------------------------------------|----------------------------|------|------|--------|
| pmb3264 | Glutathione oxidized               | Amino acid and derivatives | 1.05 | 0.02 | -5.62  |
| pme0056 | 2,3-dimethylsuccinic acid          | Amino acid and derivatives | 1.23 | 0.01 | -6.22  |
| pmf0018 | 1-Aminocyclopropanecarboxylic acid | Amino acid and derivatives | 0.55 | 0.00 | -11.21 |
| pme0173 | N-Propionylglycine                 | Amino acid and derivatives | 1.23 | 0.00 | -13.08 |
| pme0180 | 1-Methylhistidine                  | Amino acid and derivatives | 1.23 | 0.00 | -14.10 |
| pme1322 | N $\alpha$ -Acetyl-L-arginine      | Amino acid and derivatives | 1.23 | 0.00 | -14.38 |
| pme3827 | 3,4-Dihydroxy-DL-phenylalanine     | Amino acid and derivatives | 1.23 | 0.00 | -16.93 |

## Supplementary file 2: The differential metabolites of the heartwood and sapwood.

| Index   | Compounds                                              | Class                         | VIP  | Fold_Change | Log2FC | Type |
|---------|--------------------------------------------------------|-------------------------------|------|-------------|--------|------|
| pmb0675 | C-pentosyl-apigenin<br>O-p-coumaroylhexoside           | Flavone                       | 1.23 | 2051851.85  | 20.97  | up   |
| pmf0604 | $\beta$ -Caryophyllene                                 | Terpene                       | 1.23 | 1548148.15  | 20.56  | up   |
| pmf0481 | Dehydrocorydaline                                      | Alkaloids                     | 1.22 | 786666.67   | 19.59  | up   |
| pma6389 | Ayanin                                                 | Flavonol                      | 1.23 | 708148.15   | 19.43  | up   |
| pmf0010 | Xanthoxol                                              | Phenylpropanoids              | 1.23 | 555925.93   | 19.08  | up   |
| pme2289 | Vitamin A                                              | Vitamins and derivatives      | 1.23 | 314444.44   | 18.26  | up   |
| pme0237 | Ethyl 3,4-Dihydroxybenzoate<br>(Ethyl protocatechuate) | Organic acids and derivatives | 1.23 | 266296.30   | 18.02  | up   |
| pmf0164 | Schizandrin B                                          | Phenylpropanoids              | 1.23 | 200740.74   | 17.61  | up   |
| pme2658 | N-Methyltryptamine                                     | Alkaloids                     | 1.23 | 165925.93   | 17.34  | up   |
| pme2247 | Ellagic acid                                           | Polyphenol                    | 1.22 | 162481.48   | 17.31  | up   |
| pma6360 | O-methylChrysoeriol<br>8-C-hexoside                    | Flavone                       | 1.23 | 131111.11   | 17.00  | up   |
| pme0444 | Malvidin 3-O-glucoside (Oenin)                         | Anthocyanins                  | 1.23 | 130888.89   | 17.00  | up   |
| pmf0476 | Croctin                                                | Terpene                       | 1.23 | 119666.67   | 16.87  | up   |
| pma6199 | Chrysin O-hexoside                                     | Flavone                       | 1.23 | 119259.26   | 16.86  | up   |
| pmf0296 | 16-Hydroxy hexadecanoic acid                           | Lipids                        | 1.23 | 115148.15   | 16.81  | up   |
| pme0443 | Malvidin 3-O-galactoside                               | Anthocyanins                  | 1.22 | 101592.59   | 16.63  | up   |
| pmb1587 | 4-Hydroxy-3,5-diisopropyl<br>benzaldehyde              | Organic acids and derivatives | 1.23 | 100814.81   | 16.62  | up   |
| pmf0386 | Prehelminthosporolactone                               | Others                        | 1.22 | 100555.56   | 16.62  | up   |
| pmf0404 | Ethyl cinnamate                                        | Phenylpropanoids              | 1.23 | 81074.07    | 16.31  | up   |
| pmb0566 | Luteolin O-hexosyl-O-pentoside                         | Flavone                       | 1.22 | 80074.07    | 16.29  | up   |
| pma6638 | O-methylChrysoeriol<br>7-O-hexoside                    | Flavone                       | 1.23 | 75259.26    | 16.20  | up   |
| pma0253 | O-methylChrysoeriol<br>5-O-hexoside                    | Flavone                       | 1.22 | 69925.93    | 16.09  | up   |
| pmb0863 | LysoPC 16:2 (2n isomer)                                | Lipids                        | 1.23 | 68037.04    | 16.05  | up   |
| pmf0122 | 1,10-decanediol                                        | Alcohols                      | 1.22 | 59000.00    | 15.85  | up   |
| pmf0479 | 8-Methoxypsoralen                                      | Phenylpropanoids              | 1.23 | 54333.33    | 15.73  | up   |
| pme3553 | Psoralen                                               | Phenylpropanoids              | 1.22 | 51148.15    | 15.64  | up   |
| pme1478 | Myricetin                                              | Flavonol                      | 1.23 | 50074.07    | 15.61  | up   |
| pmf0582 | Glabridin                                              | Flavonoid                     | 1.23 | 48370.37    | 15.56  | up   |
| pmb2849 | Camptothecin                                           | Alkaloids                     | 1.23 | 47222.22    | 15.53  | up   |
| pmb2222 | Phytocassane C                                         | Terpene                       | 1.23 | 46925.93    | 15.52  | up   |
| pme3279 | 2'-Hydroxygenistein                                    | Isoflavone                    | 1.23 | 45962.96    | 15.49  | up   |
| pmf0551 | Tectochrysin                                           | Flavonoid                     | 1.23 | 44629.63    | 15.45  | up   |
| pmf0500 | Capsaicin                                              | Alkaloids                     | 1.22 | 43666.67    | 15.41  | up   |
| pmb0890 | MAG (18:2)                                             | Lipids                        | 1.23 | 40592.59    | 15.31  | up   |
| pme2987 | 3,4-Dihydrocoumarin                                    | Phenylpropanoids              | 1.22 | 39407.41    | 15.27  | up   |
| pmb0623 | 6-C-hexosyl<br>chrysoeriol O-hexoside                  | Flavone                       | 1.23 | 38962.96    | 15.25  | up   |
| pmb0674 | C-pentosyl apigenin<br>O-salicyloyl hexoside           | Flavone                       | 1.22 | 38629.63    | 15.24  | up   |



|         |                                      |                               |      |          |       |    |
|---------|--------------------------------------|-------------------------------|------|----------|-------|----|
| pmb3046 | Tricin 7-O-hexoside                  | Flavone                       | 1.22 | 36296.30 | 15.15 | up |
| pme3137 | 3-Hydroxyflavone                     | Flavonol                      | 1.23 | 36000.00 | 15.14 | up |
| pme3451 | Rotenone                             | Isoflavone                    | 1.23 | 35777.78 | 15.13 | up |
| pme2776 | 2'-Deoxyinosine                      | Nucleotide and derivates      | 1.23 | 35296.30 | 15.11 | up |
| pme2963 | Aromadedrin<br>(Dihydrokaempferol)   | Flavonol                      | 1.23 | 35185.19 | 15.10 | up |
| pmf0311 | Coronatine                           | Alkaloids                     | 1.22 | 33703.70 | 15.04 | up |
| pmb0621 | C-hexosyl-isorhamnetin<br>O-hexoside | Flavone                       | 1.23 | 32814.81 | 15.00 | up |
| pmf0328 | lumichrome                           | Alkaloids                     | 1.23 | 31370.37 | 14.94 | up |
| pmb0751 | 5-O-p-Coumaroyl shikimic acid        | Organic acids and derivatives | 1.22 | 29518.52 | 14.85 | up |
| pmb0767 | D-erythro-Dihydrosphingosine         | Alcohols                      | 1.22 | 28592.59 | 14.80 | up |
| pmf0292 | D-erythro-sphinganine                | Amino acid and derivatives    | 1.23 | 26555.56 | 14.70 | up |
| pmf0568 | Tectorigenin                         | Flavonoid                     | 1.23 | 26111.11 | 14.67 | up |
| pmb0358 | Selgin O-hexosyl-O-hexoside          | Flavone                       | 1.23 | 25481.48 | 14.64 | up |
| pmb2467 | $\alpha$ -Linolenic acid             | Lipids                        | 1.23 | 25481.48 | 14.64 | up |
| pmf0246 | Orientin                             | Flavonoid                     | 1.23 | 23074.07 | 14.49 | up |
| pmf0518 | Dehydrocostus lactone                | Others                        | 1.23 | 23000.00 | 14.49 | up |
| pme0080 | Cucurbitacin B                       | Terpene                       | 1.22 | 22837.04 | 14.48 | up |
| pmf0437 | Harpagoside                          | Others                        | 1.23 | 21592.59 | 14.40 | up |
| pmb3053 | Tricin O-eudesmic acid               | Flavone                       | 1.22 | 21555.56 | 14.40 | up |
| pmb1530 | Phytocassane D                       | Terpene                       | 1.23 | 21407.41 | 14.39 | up |
| pme1458 | Resveratrol                          | Phenylpropanoids              | 1.23 | 20925.93 | 14.35 | up |
| pme1724 | Methyl benzoate                      | Organic acids and derivatives | 1.22 | 19970.37 | 14.29 | up |
| pmb0382 | O-Feruloyl 4-hydroxylcoumarin        | Phenylpropanoids              | 1.23 | 19629.63 | 14.26 | up |
| pmf0525 | Imperatorin                          | Phenylpropanoids              | 1.23 | 18629.63 | 14.19 | up |
| pmf0419 | Salicin                              | Organic acids and derivatives | 1.23 | 18555.56 | 14.18 | up |
| pmf0159 | Azadiradione                         | Sterides                      | 1.23 | 18333.33 | 14.16 | up |
| pmf0592 | Artemisinin                          | Terpene                       | 1.23 | 17925.93 | 14.13 | up |
| pmf0453 | Demethoxycurcumin                    | Polyphenol                    | 1.23 | 17407.41 | 14.09 | up |
| pmf0526 | Isoimperatorin                       | Phenylpropanoids              | 1.23 | 16851.85 | 14.04 | up |
| pme3372 | Rhamnetin<br>(7-O-methxyl quercetin) | Flavonol                      | 1.23 | 16259.26 | 13.99 | up |
| pmb1178 | O-Feruloyl 2-hydroxylcoumarin        | Phenylpropanoids              | 1.23 | 16222.22 | 13.99 | up |
| pmf0612 | Piperine                             | Alkaloids                     | 1.23 | 16222.22 | 13.99 | up |
| pma3499 | Digitoxigenine                       | Others                        | 1.22 | 15959.26 | 13.96 | up |
| pmb0149 | MAG (18:4) isomer1                   | Lipids                        | 1.22 | 14974.07 | 13.87 | up |
| pmb2325 | MAG (18:3) isomer2                   | Lipids                        | 1.23 | 14666.67 | 13.84 | up |
| pme1472 | Vanillic acid                        | Phenylpropanoids              | 1.23 | 14666.67 | 13.84 | up |
| pme2184 | Nomilin                              | Terpene                       | 1.22 | 14600.00 | 13.83 | up |
| pmf0527 | Osthole                              | Phenylpropanoids              | 1.22 | 14318.52 | 13.81 | up |
| pma1303 | LysoPC 16:2                          | Lipids                        | 1.22 | 14114.81 | 13.78 | up |
| pmf0522 | alpha-Santonin                       | Others                        | 1.23 | 13337.04 | 13.70 | up |
| pmb0724 | Tricin O-rhamnoside                  | Flavone                       | 1.23 | 12848.15 | 13.65 | up |
| pme0299 | trans-Cinnamate                      | Phenylpropanoids              | 1.23 | 12222.22 | 13.58 | up |
| pmf0307 | Solasodine                           | Alkaloids                     | 1.22 | 11851.85 | 13.53 | up |
| pmf0329 | Protopine                            | Alkaloids                     | 1.22 | 10151.85 | 13.31 | up |
| pmf0611 | Chalcone                             | Flavonoid                     | 1.22 | 10122.22 | 13.31 | up |

|         |                                        |                               |      |         |       |    |
|---------|----------------------------------------|-------------------------------|------|---------|-------|----|
| pmf0272 | Galactinol Dihydrate                   | Carbohydrates                 | 1.23 | 9485.19 | 13.21 | up |
| pmb3052 | Tricin 4'-O- $\beta$ -guaiacylglycerol | Flavone                       | 1.21 | 8200.00 | 13.00 | up |
| pme1399 | Xanthohumol                            | Flavanone                     | 1.23 | 7825.93 | 12.93 | up |
| pmb0864 | LysoPE 14:0                            | Lipids                        | 1.22 | 7188.89 | 12.81 | up |
| pmf0421 | Aloin A                                | Quinones                      | 1.23 | 6492.59 | 12.66 | up |
| pmf0391 | Batatasin III                          | Others                        | 1.23 | 6037.04 | 12.56 | up |
| pmb2787 | 9-KODE                                 | Lipids                        | 1.23 | 5255.56 | 12.36 | up |
| pmf0387 | Dihydrorehelminthosporol               | Others                        | 1.23 | 5074.07 | 12.31 | up |
| pmb0571 | Apigenin O-hexosyl-O-pentoside         | Flavone                       | 1.22 | 4907.41 | 12.26 | up |
| pme0064 | Cucurbitacin I                         | Terpene                       | 1.22 | 4162.96 | 12.02 | up |
| pmf0493 | Puararin                               | Flavonoid                     | 1.23 | 4048.15 | 11.98 | up |
| pme1611 | Isohemiphloin                          | Flavone                       | 1.23 | 3637.04 | 11.83 | up |
| pmf0549 | Diosmin                                | Flavonoid                     | 1.23 | 2848.15 | 11.48 | up |
| pmb2640 | Lauric acid (C12:0)                    | Lipids                        | 1.23 | 1766.67 | 10.79 | up |
| pmf0535 | Carvacrol                              | Others                        | 1.23 | 1469.63 | 10.52 | up |
| pmb0426 | 5-Methoxy-N,N-dimethyltryptamine       | Alkaloids                     | 1.13 | 988.93  | 9.95  | up |
| pmf0473 | Baccatin III                           | Alkaloids                     | 1.01 | 512.73  | 9.00  | up |
| pmf0102 | Ajmaline                               | Alkaloids                     | 1.02 | 434.11  | 8.76  | up |
| pmf0574 | Sucralose                              | Carbohydrates                 | 1.06 | 107.05  | 6.74  | up |
| pme2786 | N-Acetyl-5-hydroxytryptamine           | Alkaloids                     | 1.05 | 104.35  | 6.71  | up |
| pmb0580 | Chrysin 5-O-glucoside (Toringin)       | Flavone                       | 1.03 | 71.33   | 6.16  | up |
| pmf0543 | Podophyllotoxin                        | Phenylpropanoids              | 1.01 | 61.22   | 5.94  | up |
| pma1839 | N-sinapoyl cadaverine                  | Phenolamides                  | 1.03 | 54.94   | 5.78  | up |
| pmb0717 | Tricin 5-O- $\beta$ -guaiacylglycerol  | Flavone                       | 1.17 | 39.99   | 5.32  | up |
| pme2362 | Mandelic acid                          | Organic acids and derivatives | 1.15 | 34.29   | 5.10  | up |
| pme2266 | Biotin                                 | Vitamins and derivatives      | 1.21 | 28.20   | 4.82  | up |
| pmf0057 | 4,2',4',6'-Tetrahydroxychalcone        | Flavone                       | 1.19 | 23.28   | 4.54  | up |
| pme2957 | Naringenin chalcone                    | Flavanone                     | 1.18 | 20.49   | 4.36  | up |
| pme0256 | Xanthine                               | Nucleotide and derivates      | 1.21 | 20.14   | 4.33  | up |
| pme0376 | Naringenin                             | Flavanone                     | 1.18 | 17.86   | 4.16  | up |
| pme1588 | Isorhamnetin                           | Flavonol                      | 1.14 | 13.00   | 3.70  | up |
| pme1952 | Riboflavin                             | Vitamins and derivatives      | 1.16 | 8.94    | 3.16  | up |
| pme0281 | Adenosine O-ribose                     | Nucleotide and derivates      | 1.22 | 8.86    | 3.15  | up |
| pme3453 | p-Coumaraldehyde                       | Phenylpropanoids              | 1.18 | 8.36    | 3.06  | up |
| pmf0564 | Ecdysterone                            | Sterides                      | 1.20 | 7.98    | 3.00  | up |
| pme3305 | p-Coumaryl alcohol                     | Phenylpropanoids              | 1.11 | 7.57    | 2.92  | up |
| pmf0270 | (E)-p-coumaric acid                    | Phenylpropanoids              | 1.17 | 7.55    | 2.92  | up |
| pme0303 | Caffeate                               | Phenylpropanoids              | 1.20 | 7.49    | 2.90  | up |
| pme0516 | Inositol                               | Alcohols                      | 1.22 | 7.30    | 2.87  | up |
| pme3288 | 3,7-Di-O-methylquercetin               | Flavonol                      | 1.06 | 7.16    | 2.84  | up |
| pmb0813 | 1-Methoxyindole-3-carbaldehyde         | Indole derivatives            | 1.15 | 6.92    | 2.79  | up |
| pma6218 | O-methylnaringenin C-pentoside         | Flavone                       | 1.21 | 5.66    | 2.50  | up |
| pmf0396 | Linoleic acid                          | Lipids                        | 1.18 | 5.50    | 2.46  | up |
| pmb3074 | 3-O-p-Coumaroyl quinic acid            | Organic acids and derivatives | 1.08 | 5.42    | 2.44  | up |
| pmf0165 | Schisandrin C                          | Phenylpropanoids              | 1.20 | 5.36    | 2.42  | up |
| pme0195 | L-Cysteine                             | Amino acid and derivatives    | 1.21 | 5.25    | 2.39  | up |
| pmf0586 | Schizandrin C                          | Phenylpropanoids              | 1.18 | 4.87    | 2.28  | up |

|         |                                    |                               |      |      |       |      |
|---------|------------------------------------|-------------------------------|------|------|-------|------|
| pmf0286 | Phytol                             | Terpene                       | 1.20 | 4.64 | 2.21  | up   |
| pme1436 | p-Coumaric acid                    | Phenylpropanoids              | 1.19 | 4.22 | 2.08  | up   |
| pme3705 | D-glucuronic acid                  | Others                        | 1.21 | 3.82 | 1.93  | up   |
| pme3965 | 2-(dimethylamino)guanosine         | Nucleotide and derivatives    | 1.13 | 3.80 | 1.93  | up   |
| pme1814 | 2,5-dihydroxybenzoic acid          | Organic acids and derivatives | 1.18 | 3.36 | 1.75  | up   |
| pme2478 | Protocatechuic aldehyde            | Polyphenol                    | 1.13 | 3.33 | 1.74  | up   |
| pme3198 | 2,4-Dihydroxybenzoic acid          | Organic acids and derivatives | 1.17 | 3.32 | 1.73  | up   |
| pme1824 | Protocatechuic acid                | Polyphenol                    | 1.17 | 3.31 | 1.73  | up   |
| pme2706 | 2,3-Dihydroxybenzoic acid          | Organic acids and derivatives | 1.17 | 3.31 | 1.73  | up   |
| pme2761 | 4-Hydroxy-2-oxoglutaric acid       | Organic acids and derivatives | 1.19 | 2.87 | 1.52  | up   |
| pme2237 | Dulcitol                           | Alcohols                      | 1.16 | 2.69 | 1.43  | up   |
| pme0499 | D-Sorbitol                         | Alcohols                      | 1.14 | 2.68 | 1.42  | up   |
| pmb0889 | Punicic acid                       | Lipids                        | 1.15 | 2.64 | 1.40  | up   |
| pmf0280 | D-Galacturonic acid                | Organic acids and derivatives | 1.20 | 2.50 | 1.32  | up   |
| pmb0758 | Anisic acid O-feruloyl hexoside    | Organic acids and derivatives | 1.02 | 2.44 | 1.29  | up   |
| pmb2786 | 9-HOTrE                            | Lipids                        | 1.09 | 2.29 | 1.19  | up   |
| pmb2981 | Apigenin C-hexosyl-O-rutinoside    | Flavone                       | 1.06 | 2.27 | 1.19  | up   |
| pmf0265 | 5,7-Dihydroxychromone              | Flavonoid                     | 1.09 | 0.49 | -1.03 | down |
| pme0309 | Methyl gallate                     | Organic acids and derivatives | 1.07 | 0.47 | -1.07 | down |
| pme0279 | 2,6-Diaminooimelic acid            | Amino acid and derivatives    | 1.15 | 0.47 | -1.08 | down |
| pme0422 | 3-Hydroxy-4-methoxycinnamic acid   | Phenylpropanoids              | 1.00 | 0.46 | -1.13 | down |
| pmf0398 | Arachidic acid                     | Lipids                        | 1.19 | 0.45 | -1.14 | down |
| pme0239 | 2-furanoic acid                    | Organic acids and derivatives | 1.09 | 0.42 | -1.24 | down |
| pme0038 | Cytosine                           | Nucleotide and derivatives    | 1.12 | 0.42 | -1.24 | down |
| pma2987 | Histidinol                         | Alcohols                      | 1.18 | 0.42 | -1.25 | down |
| pme1730 | D-Erythronolactone                 | Organic acids and derivatives | 1.20 | 0.41 | -1.29 | down |
| pme3419 | Esculetin (6,7-dihydroxycoumarin)  | Phenylpropanoids              | 1.21 | 0.40 | -1.33 | down |
| pme1383 | Pyridoxine                         | Vitamins and derivatives      | 1.02 | 0.39 | -1.35 | down |
| pme2636 | Enterodiol                         | Alcohols                      | 1.21 | 0.39 | -1.37 | down |
| pmb0882 | LysoPC 18:1                        | Lipids                        | 1.11 | 0.37 | -1.43 | down |
| pme2617 | Methionine sulfoxide               | Amino acid and derivatives    | 1.23 | 0.36 | -1.46 | down |
| pme0363 | Chrysoeriol                        | Flavone                       | 1.10 | 0.36 | -1.47 | down |
| pmb1650 | Octadeca-11E,13E,15Z-trienoic acid | Lipids                        | 1.21 | 0.36 | -1.48 | down |
| pme1820 | p-Hydroxyphenyl acetic acid        | Organic acids and derivatives | 1.10 | 0.35 | -1.50 | down |
| pmb0964 | iP7G                               | Nucleotide and derivatives    | 1.20 | 0.35 | -1.53 | down |
| pme3461 | Homoeriodictyol                    | Flavanone                     | 1.15 | 0.34 | -1.55 | down |
| pme2529 | 1,5-Anhydro-D-glucitol             | Alcohols                      | 1.15 | 0.34 | -1.55 | down |
| pmb2857 | L-Glutamic acid O-glucoside        | Amino acid and derivatives    | 1.19 | 0.34 | -1.57 | down |
| pme2380 | A-Ketoglutaric acid                | Organic acids and derivatives | 1.21 | 0.32 | -1.62 | down |
| pmb3894 | Di-O-methylquercetin               | Flavonol                      | 1.16 | 0.32 | -1.63 | down |
| pme2923 | Acetoxyacetic acid                 | Organic acids and derivatives | 1.05 | 0.32 | -1.65 | down |
| pme3292 | Prunetin                           | Isoflavone                    | 1.04 | 0.32 | -1.66 | down |
| pmd0160 | LysoPE 16:0 (2n isomer)            | Lipids                        | 1.16 | 0.31 | -1.67 | down |
| pmb3117 | LysoPE 16:0                        | Lipids                        | 1.15 | 0.31 | -1.70 | down |
| pmd0017 | Spermine                           | Phenolamides                  | 1.21 | 0.30 | -1.71 | down |
| pme0379 | Apigenin                           | Flavone                       | 1.20 | 0.30 | -1.72 | down |

|         |                                              |                               |      |      |       |      |
|---------|----------------------------------------------|-------------------------------|------|------|-------|------|
| pmb2855 | L-Glutamine O-hexside                        | Amino acid and derivatives    | 1.22 | 0.30 | -1.74 | down |
| pme0496 | Nicotinic acid                               | Vitamins and derivatives      | 1.14 | 0.29 | -1.80 | down |
| pme2601 | 3-Hydroxypropanoic acid                      | Organic acids and derivatives | 1.01 | 0.28 | -1.83 | down |
| pmf0541 | Shikonin                                     | Quinones                      | 1.19 | 0.28 | -1.84 | down |
| pme1021 | D-(+)-Glucono-1,5-lactone                    | Carbohydrates                 | 1.18 | 0.27 | -1.87 | down |
| pme0137 | N $\alpha$ -Acetyl-L-glutamine               | Amino acid and derivatives    | 1.19 | 0.27 | -1.89 | down |
| pmb2654 | Anthranilate<br>O-hexosyl-O-hexoside         | Organic acids and derivatives | 1.05 | 0.27 | -1.91 | down |
| pme3250 | Biochanin A                                  | Isoflavone                    | 1.06 | 0.26 | -1.92 | down |
| pmb0488 | Spermidine                                   | Phenolamides                  | 1.15 | 0.26 | -1.93 | down |
| pme0486 | Methylmalonic acid                           | Organic acids and derivatives | 1.18 | 0.25 | -2.00 | down |
| pme3096 | Aminomalonic acid                            | Organic acids and derivatives | 1.18 | 0.25 | -2.01 | down |
| pme1830 | Succinic acid                                | Organic acids and derivatives | 1.18 | 0.25 | -2.01 | down |
| pme0291 | DL-2-Aminooctanoic acid                      | Organic acids and derivatives | 1.21 | 0.24 | -2.05 | down |
| pme2949 | Hesperetin 7-rutinoside<br>(Hesperidin)      | Flavanone                     | 1.09 | 0.24 | -2.07 | down |
| pme1599 | 7-O-Methylepidietylol                        | Flavanone                     | 1.07 | 0.23 | -2.09 | down |
| pme2167 | Orotic acid                                  | Vitamins and derivatives      | 1.13 | 0.23 | -2.12 | down |
| pmf0274 | Herbacetin                                   | Flavonoid                     | 1.17 | 0.23 | -2.13 | down |
| pme2596 | 4-Pyridoxic acid                             | Alkaloids                     | 1.17 | 0.22 | -2.19 | down |
| pmb2826 | Citramalate                                  | Organic acids and derivatives | 1.03 | 0.21 | -2.22 | down |
| pme2019 | DL-Arabinose                                 | Carbohydrates                 | 1.14 | 0.21 | -2.22 | down |
| pmf0578 | Citric acid monohydrate                      | Organic acids and derivatives | 1.01 | 0.21 | -2.24 | down |
| pme0321 | Kaempferol 7-O-rhamnoside                    | Flavonol                      | 1.21 | 0.21 | -2.25 | down |
| pme0387 | Homovanillic acid                            | Phenylpropanoids              | 1.18 | 0.21 | -2.26 | down |
| pmb2922 | Uridine 5'-diphospho-D-glucose               | Nucleotide and derivates      | 1.20 | 0.20 | -2.29 | down |
| pme3300 | Tricetin                                     | Flavone                       | 1.15 | 0.20 | -2.29 | down |
| pme0304 | Succinyladenosine                            | Nucleotide and derivates      | 1.08 | 0.20 | -2.33 | down |
| pme0413 | Vanillin                                     | Organic acids and derivatives | 1.21 | 0.20 | -2.33 | down |
| pme2009 | L-(+)-Tartaric acid                          | Organic acids and derivatives | 1.18 | 0.20 | -2.34 | down |
| pme1944 | D-Mannitol                                   | Alcohols                      | 1.20 | 0.19 | -2.36 | down |
| pme1605 | Kaempferol 3-O-robinobioside                 | Flavonol                      | 1.18 | 0.19 | -2.38 | down |
| pme3336 | N6-Succinyl Adenosine                        | Nucleotide and derivates      | 1.11 | 0.19 | -2.40 | down |
| pme0369 | Kaempferol 3-O-rutinoside                    | Flavonol                      | 1.15 | 0.19 | -2.40 | down |
| pme3393 | Fustin                                       | Flavonol                      | 1.20 | 0.19 | -2.43 | down |
| pme3188 | Uridine 5'-monophosphate                     | Nucleotide and derivates      | 1.19 | 0.17 | -2.52 | down |
| pme2241 | Citraconic acid                              | Organic acids and derivatives | 1.14 | 0.17 | -2.57 | down |
| pmf0059 | UDP- $\alpha$ -D-glucose                     | Nucleotide and derivates      | 1.21 | 0.17 | -2.59 | down |
| pme1097 | Adenine                                      | Nucleotide and derivates      | 1.22 | 0.16 | -2.60 | down |
| pme2036 | Quinic acid                                  | Organic acids and derivatives | 1.14 | 0.14 | -2.80 | down |
| pme1539 | sorhamnetin 3-O-neohesperidosid              | Flavonol                      | 1.16 | 0.14 | -2.80 | down |
| pme0207 | 3-Hydroxybutyrate                            | Organic acids and derivatives | 1.19 | 0.14 | -2.81 | down |
| pmf0118 | Uridine 5'-diphosphoglucose<br>disodium salt | Nucleotide and derivates      | 1.22 | 0.14 | -2.82 | down |
| pmf0179 | Narcissoside                                 | Flavonoid                     | 1.11 | 0.14 | -2.83 | down |
| pmf0464 | Farrerol                                     | Flavonoid                     | 1.09 | 0.14 | -2.84 | down |
| pme0183 | 2-Hydroxy-6-aminopurine                      | Nucleotide and derivates      | 1.20 | 0.14 | -2.89 | down |
| pmf0425 | D-tartaric acid                              | Organic acids and derivatives | 1.21 | 0.13 | -2.90 | down |

|         |                                             |                               |      |      |       |      |
|---------|---------------------------------------------|-------------------------------|------|------|-------|------|
| pme1109 | Guanine                                     | Nucleotide and derivatives    | 1.20 | 0.13 | -2.92 | down |
| pmf0282 | Melibiose                                   | Carbohydrates                 | 1.15 | 0.13 | -2.97 | down |
| pme3719 | D-Xyloic acid                               | Organic acids and derivatives | 1.21 | 0.13 | -2.98 | down |
| pmc0960 | LysoPC 20:4                                 | Lipids                        | 1.21 | 0.12 | -3.01 | down |
| pmf0175 | 2-Decanol                                   | Alcohols                      | 1.22 | 0.12 | -3.02 | down |
| pmf0174 | 1-Decanol                                   | Alcohols                      | 1.22 | 0.12 | -3.03 | down |
| pme0519 | D-(+)-Sucrose                               | Carbohydrates                 | 1.15 | 0.12 | -3.05 | down |
| pmb0859 | LysoPC 18:1 (2n isomer)                     | Lipids                        | 1.23 | 0.12 | -3.08 | down |
| pme3443 | Sinapinaldehyde                             | Phenylpropanoids              | 1.20 | 0.12 | -3.09 | down |
| pmf0032 | Galactinol                                  | Carbohydrates                 | 1.16 | 0.12 | -3.11 | down |
| pmb0962 | Lysine butyrate                             | Amino acid and derivatives    | 1.04 | 0.11 | -3.16 | down |
| pme2050 | Citric acid                                 | Organic acids and derivatives | 1.10 | 0.11 | -3.25 | down |
| pmb1912 | 10-Formyl-THF                               | Organic acids and derivatives | 1.20 | 0.10 | -3.37 | down |
| pme2169 | Fumaric acid                                | Organic acids and derivatives | 1.20 | 0.09 | -3.48 | down |
| pme0033 | Hypoxanthine                                | Nucleotide and derivatives    | 1.22 | 0.09 | -3.51 | down |
| pme0275 | 4-Oxopentanoate                             | Organic acids and derivatives | 1.19 | 0.07 | -3.82 | down |
| pme3313 | D-Fructose 6-phosphate                      | Carbohydrates                 | 1.14 | 0.07 | -3.93 | down |
| pmd0136 | LysoPC 18:0                                 | Lipids                        | 1.22 | 0.06 | -4.14 | down |
| pme0534 | Gluconic acid                               | Others                        | 1.20 | 0.05 | -4.31 | down |
| pmb1754 | O-Phosphocholine                            | Alkaloids                     | 1.13 | 0.04 | -4.52 | down |
| pme3160 | D-Glucose 6-phosphate                       | Carbohydrates                 | 1.20 | 0.03 | -4.97 | down |
| pmf0035 | Glucose-1-phosphate                         | Carbohydrates                 | 1.18 | 0.03 | -5.01 | down |
| pmb0981 | Adenosine 5'-monophosphate                  | Nucleotide and derivatives    | 1.21 | 0.03 | -5.08 | down |
| pme3282 | Afzelechin<br>(3,5,7,4'-Tetrahydroxyflavan) | Flavanone                     | 1.01 | 0.03 | -5.15 | down |
| pme0271 | Maleic acid                                 | Organic acids and derivatives | 1.05 | 0.03 | -5.20 | down |
| pmb0514 | Adenosine 3'-monophosphate                  | Nucleotide and derivatives    | 1.22 | 0.03 | -5.31 | down |
| pmf0220 | D-Fructose 6-phosphate-<br>disodium salt    | Carbohydrates                 | 1.19 | 0.02 | -5.36 | down |
| pme1175 | Guanosine                                   | Nucleotide and derivatives    | 1.03 | 0.02 | -5.45 | down |
| pme2049 | 2-Hydroxybutanoic acid                      | Organic acids and derivatives | 1.22 | 0.02 | -5.49 | down |
| pmb2657 | Argininosuccinate                           | Organic acids and derivatives | 1.14 | 0.02 | -5.52 | down |
| pme0004 | L-Homocitrulline                            | Amino acid and derivatives    | 1.03 | 0.02 | -5.58 | down |
| pmb3264 | Glutathione oxidized                        | Amino acid and derivatives    | 1.05 | 0.02 | -5.62 | down |
| pmb3081 | Glucarate O-Phosphoric acid                 | Others                        | 1.02 | 0.02 | -5.64 | down |
| pmb4344 | Guanosine 5'-monophosphate                  | Nucleotide and derivatives    | 1.06 | 0.02 | -5.71 | down |
| pme1063 | Uridine                                     | Nucleotide and derivatives    | 1.19 | 0.02 | -5.76 | down |
| pmf0326 | Apocynin                                    | Phenylpropanoids              | 1.03 | 0.01 | -6.18 | down |
| pme0056 | 2,3-dimethylsuccinic acid                   | Amino acid and derivatives    | 1.23 | 0.01 | -6.22 | down |
| pme2033 | L(-)-Malic acid                             | Organic acids and derivatives | 1.22 | 0.01 | -6.24 | down |
| pme3309 | 2-Methylglutaric acid                       | Organic acids and derivatives | 1.23 | 0.01 | -6.27 | down |
| pmb3088 | Trehalose 6-phosphate                       | Carbohydrates                 | 1.20 | 0.01 | -6.41 | down |
| pmb0854 | LysoPC 18:3                                 | Lipids                        | 1.22 | 0.01 | -6.50 | down |
| pmb0532 | Inosine 5'-monophosphate                    | Nucleotide and derivatives    | 1.06 | 0.01 | -6.52 | down |
| pmb0855 | LysoPC 16:0                                 | Lipids                        | 1.22 | 0.01 | -6.59 | down |
| pme3098 | 4-Methylvaleric acid                        | Organic acids and derivatives | 1.09 | 0.01 | -6.67 | down |
| pmd0132 | LysoPC 16:0 (2n isomer)                     | Lipids                        | 1.22 | 0.01 | -6.68 | down |

|         |                                            |                               |      |      |        |      |
|---------|--------------------------------------------|-------------------------------|------|------|--------|------|
| pmf0217 | D-Glucose-6-phosphate disodium salt        | Others                        | 1.22 | 0.01 | -6.82  | down |
| pme2541 | $\alpha$ -Hydroxyisobutyric acid           | Organic acids and derivatives | 1.07 | 0.01 | -6.83  | down |
| pmf0485 | Panose                                     | Carbohydrates                 | 1.21 | 0.01 | -6.95  | down |
| pme0243 | Glutaric acid                              | Organic acids and derivatives | 1.22 | 0.01 | -7.00  | down |
| pme2129 | (S)-(-)-2-Hydroxyisocaproic acid           | Organic acids and derivatives | 1.20 | 0.01 | -7.01  | down |
| pma6270 | sn-Glycero-3-phosphocholine                | Alkaloids                     | 1.21 | 0.01 | -7.03  | down |
| pme0267 | 2-Methylsuccinic acid                      | Organic acids and derivatives | 1.22 | 0.01 | -7.20  | down |
| pme0250 | Azelaic acid                               | Organic acids and derivatives | 1.21 | 0.01 | -7.62  | down |
| pmf0348 | 2,6-Dimethyl-7-octene-2,3,6-triol          | Alcohols                      | 1.22 | 0.00 | -7.64  | down |
| pme1977 | Suberic acid                               | Organic acids and derivatives | 1.22 | 0.00 | -8.43  | down |
| pme3235 | Liquiritigenin                             | Flavanone                     | 1.22 | 0.00 | -10.98 | down |
| pme2935 | 2-Oxovaleric acid                          | Organic acids and derivatives | 1.23 | 0.00 | -11.62 | down |
| pmb2928 | Gallic acid O-Hexoside                     | Organic acids and derivatives | 1.23 | 0.00 | -12.04 | down |
| pmb0588 | Luteolin 3',7-di-O-glucoside               | Flavone                       | 1.23 | 0.00 | -12.42 | down |
| pmf0098 | trans-4-Hydroxycinnamic acid Methyl Ester  | Phenylpropanoids              | 1.23 | 0.00 | -12.76 | down |
| pme2284 | Pentadecafluorooctanoic acid               | Organic acids and derivatives | 1.23 | 0.00 | -12.78 | down |
| pme0173 | N-Propionylglycine                         | Amino acid and derivatives    | 1.23 | 0.00 | -13.08 | down |
| pmf0513 | Ruscogenin                                 | Sterides                      | 1.23 | 0.00 | -13.35 | down |
| pmd0023 | Adenosine                                  | Nucleotide and derivates      | 1.23 | 0.00 | -13.61 | down |
| pma2405 | Feruloylcholine                            | Alkaloids                     | 1.23 | 0.00 | -13.71 | down |
| pmb2228 | LysoPC 19:0                                | Lipids                        | 1.23 | 0.00 | -13.73 | down |
| pmb3079 | N-Acetylglucosamine 1-phosphate            | Others                        | 1.22 | 0.00 | -13.75 | down |
| pme1299 | DL-3,4-Dihydroxymandelic acid              | Organic acids and derivatives | 1.23 | 0.00 | -13.85 | down |
| pme1711 | 3-Hydroxy-3-methyl butyric acid            | Organic acids and derivatives | 1.23 | 0.00 | -13.87 | down |
| pme2879 | 5-Hydroxymethyluracil                      | Nucleotide and derivates      | 1.23 | 0.00 | -14.01 | down |
| pme0180 | 1-Methylhistidine                          | Amino acid and derivatives    | 1.23 | 0.00 | -14.10 | down |
| pme0266 | Sebacate                                   | Organic acids and derivatives | 1.23 | 0.00 | -14.15 | down |
| pma0294 | Chrysoeriol 5-O-hexoside                   | Flavone                       | 1.23 | 0.00 | -14.29 | down |
| pma6639 | Isorhamnetin O-hexoside                    | Flavonol                      | 1.23 | 0.00 | -14.31 | down |
| pmb0607 | Chrysoeriol 7-O-hexoside                   | Flavone                       | 1.23 | 0.00 | -14.34 | down |
| pmf0374 | Isorhamnetin 3-O-glucoside                 | Flavonoid                     | 1.23 | 0.00 | -14.36 | down |
| pme1322 | N $\alpha$ -Acetyl-L-arginine              | Amino acid and derivatives    | 1.23 | 0.00 | -14.38 | down |
| pmb0595 | Isorhamnetin 5-O-hexoside                  | Flavonol                      | 1.23 | 0.00 | -14.51 | down |
| pme3154 | (Rs)-Mevalonic acid                        | Organic acids and derivatives | 1.23 | 0.00 | -14.58 | down |
| pme3174 | Cytidine 5'-monophosphate (Cytidylic acid) | Nucleotide and derivates      | 1.22 | 0.00 | -14.58 | down |
| pmb0542 | Cyanidin 3-O-malonylhexoside               | Anthocyanins                  | 1.23 | 0.00 | -14.63 | down |
| pme1294 | Xanthosine                                 | Nucleotide and derivates      | 1.23 | 0.00 | -14.67 | down |
| pmf0418 | Curdione                                   | Others                        | 1.23 | 0.00 | -15.28 | down |
| pmb0696 | 8-C-hexosyl chrysoeriol O-hexoside         | Flavone                       | 1.23 | 0.00 | -15.69 | down |
| pme3263 | 2'-Hydroxydaidzein                         | Isoflavone                    | 1.23 | 0.00 | -15.93 | down |
| pme3034 | ethylmalonate                              | Organic acids and derivatives | 1.23 | 0.00 | -16.32 | down |
| pme3197 | Cyclic AMP                                 | Nucleotide and derivates      | 1.22 | 0.00 | -16.33 | down |
| pme0391 | 4-Methylumbelliferone                      | Phenylpropanoids              | 1.23 | 0.00 | -16.80 | down |
| pme3827 | 3,4-Dihydroxy-DL-phenylalanine             | Amino acid and derivatives    | 1.23 | 0.00 | -16.93 | down |

|         |                                      |                               |      |      |        |      |
|---------|--------------------------------------|-------------------------------|------|------|--------|------|
| pmb2871 | 2,5-dihydroxy benzoic acid O-hexside | Organic acids and derivatives | 1.23 | 0.00 | -17.28 | down |
| pmb2831 | Protocatechuic acid O-glucoside      | Polyphenol                    | 1.22 | 0.00 | -17.62 | down |
| pmb2406 | LysoPC 17:0                          | Lipids                        | 1.23 | 0.00 | -17.82 | down |
| pmf0173 | 1,2-Decanediol                       | Alcohols                      | 1.23 | 0.00 | -18.44 | down |
